1 **Stable behavioral state-specific large scale activity patterns in the developing**  
2 **cortex of neonates**

3

4 Abbreviated title: Behavioral state-specific cortical activity in neonates

5

6 Nima Mojtahedi<sup>a</sup>, Yury Kovalchuk<sup>a</sup>, Alexander Böttcher<sup>b</sup>, Olga Garaschuk<sup>a,\*</sup>

7

8 <sup>a</sup> Institute of Physiology, Department of Neurophysiology, Eberhard Karls University  
9 of Tübingen, 72074 Tübingen, Germany

10 <sup>b</sup> Werner Reichardt Centre for Integrative Neuroscience, University of Tübingen,  
11 72076 Tübingen, Germany

12

13 \*Correspondence should be addressed to:

14 Prof. Dr. Olga Garaschuk: [olga.garaschuk@uni-tuebingen.de](mailto:olga.garaschuk@uni-tuebingen.de)

15

16 Number of pages: 49

17 Number of figures: 6, movies: 2

18 Number of words for abstract: 170, introduction: 811, and discussion: 1388

19

20 **Conflict of interests**

21 The authors declare no competing interests.

22 **Acknowledgments**

23 We thank E. Zirdum, A. Weible, and K. Schoentag for technical assistance and

24 Matthias Bethge for input concerning procedures for data analyses. This work was

25 supported by DFG Grant GA 654/13-1(belonging to the Research Unit FOR 2715), to

26 O.G.

1 **Abstract**

2 Endogenous neuronal activity is a hallmark of the developing brain. In rodents, a  
3 handful of such activities were described in different cortical areas but the unifying  
4 macroscopic perspective is still lacking. Here we combined large-scale *in vivo* Ca<sup>2+</sup>  
5 imaging of the dorsal cortex in non-anesthetized neonatal mice with advanced  
6 mathematical analyses to reveal unique behavioral state-specific maps of  
7 endogenous activity. These maps were remarkably stable over time within and  
8 across experiments and used patches of correlated activity with little hemispheric  
9 symmetry as well as stationary and propagating waves as building blocks.  
10 Importantly, the maps recorded during motion and rest were almost inverse, with  
11 sensory-motor areas active during motion and posterior-lateral areas active at rest.  
12 The retrosplenial cortex engaged in both resting- and motion-related activities,  
13 building functional long-range connections with respective cortical areas. The data  
14 obtained bind different region-specific activity patterns described so far into a single  
15 consistent picture and set the stage for future inactivation studies, probing the exact  
16 function of this complex activity pattern for cortical wiring in neonates.

17

18

## 1 **Introduction**

2 Mammalian cortex represents a complex computational space with information  
3 processing units interconnected via local and long-range connections. The initial  
4 formation of cortical architecture is laid out by molecular cues but its refinement  
5 critically depends on neuronal activity (Katz and Shatz, 1996; Kirkby et al., 2013;  
6 Luhmann et al., 2016). In the rodent forebrain, many of the initial coarse connections  
7 are refined during the first postnatal week leading, for example, to the eye-specific  
8 input segregation in the lateral geniculate nucleus of the thalamus and formation of  
9 the retinotopic map in the visual (Ackman and Crair, 2014; Kirkby et al., 2013) or the  
10 emergence of the barrel map in the somatosensory (Luhmann et al., 2016; Petersen,  
11 2007) cortex. Because during this time period activation of these cortices through  
12 extrinsic (sensory) stimuli is rather limited (see Fig. 2 in (Hanganu-Opatz, 2010)), this  
13 refinement likely relies on intrinsic neuronal activity.

14 In neonatal rodents, we and others have characterized multiple types of intrinsic  
15 cortical activity patterns with distinct spatiotemporal properties. *In vivo*, the latter  
16 include spindle bursts in the developing visual and somatosensory cortex (Hanganu  
17 et al., 2006; Khazipov et al., 2004), gamma and spindle bursts in the primary motor  
18 cortex (An et al., 2014), spindle-shaped field oscillations in the prefrontal cortex  
19 (Brockmann et al., 2011), intermittent population bursts in the medial entorhinal  
20 cortex (Valeeva et al., 2019), early sharp waves in the hippocampus (Valeeva et al.,  
21 2019), cortical  $\text{Ca}^{2+}$  waves/transients and accompanying spindle-shaped oscillations  
22 in the temporal and occipital cortex (Adelsberger et al., 2005; Kirmse et al., 2015),  
23 etc. Similar patterns of early spontaneous cortical activity were also found in preterm  
24 infants (McVea et al., 2016; Vanhatalo et al., 2002). In the latter, abnormal activity  
25 patterns were associated with adverse cognitive outcomes (Arichi et al., 2017),

1 whereas the frequency of physiologically patterned activity was positively correlated  
2 with brain growth (Benders et al., 2015).

3 So far, however, the mentioned above activity patterns were mostly studied in  
4 isolation, from the perspective of a given sensory or sensorimotor system (Ackman  
5 and Crair, 2014; An et al., 2014; Anton-Bolanos et al., 2019; Khazipov and Milh,  
6 2017). The results of these studies suggest that spontaneous activity of the  
7 peripheral sensory organs (e.g. developing retina or cochlea) or spontaneous muscle  
8 twitches interact with intrinsic cortical oscillators thereby modulating neuronal spiking  
9 in corresponding cortical regions (Luhmann et al., 2016). Moreover, the spontaneous  
10 network activity in some cortical regions (e.g. prefrontal, motor, or somatosensory  
11 cortex) was reported to be entrained by the activity in the other cortical/subcortical  
12 structures (e.g. hippocampus, S1, thalamus, or M1, respectively) likely priming the  
13 functional coupling between the two areas seen in the adulthood (An et al., 2014;  
14 Anton-Bolanos et al., 2019; Brockmann et al., 2011). Similarly, spontaneous network  
15 activity was suggested to sculpt both inter- and intra-hemispheric efferent projections  
16 from the developing visual cortex of rats and ferrets (Ackman and Crair, 2014).

17 Together, this data suggests that early cortical development is driven by highly  
18 complex and hierarchic patterns of endogenous activity. However, the integral map of  
19 intrinsic cortical activity in neonates as well as the spatiotemporal relationship  
20 between the activity patterns in different cortical areas remain obscure.

21 To clarify these issues, we captured intrinsic cortical activity by means of large-scale  
22 single-photon  $\text{Ca}^{2+}$  imaging and analyzed it using data-driven mathematical  
23 techniques. The data-driven nature of our approach precluded the use of the  
24 standard region of interest (ROI)-based spatial segmentation technique, as the  
25 spatial location of the endogenous activity patterns was a priori unknown. Forcing  
26 the activity pattern to be confined to a given anatomical region could be meaningful

1 for sensory-driven but not for spontaneous activity. Moreover, this approach does not  
2 apply to the developing brain where there is no fine-grained anatomical atlas and  
3 activity patterns change on a day-to-day basis, due to maturation of the underlying  
4 neural circuitry. Thus, automatic feature selection techniques, able to extract relevant  
5 features of the original high dimensional data space, had to be used. We chose a  
6 decomposition technique (Non-negative Matrix Factorization (NMF)), which doesn't  
7 need prior information about the location of ROIs and extracts information about  
8 activity patterns by positively constraining spatial and temporal components and  
9 relaxing the orthogonality constrain (used e.g. in Principal Component Analysis  
10 (PCA)), which is not essential. To study functional connectivity (i.e. statistical  
11 measure of synchronicity between activities in two different ROIs), we calculated the  
12 inverse covariance matrix and penalized our model with a sparsity regularizer  
13 (Friedman et al., 2008).

14 By using the described above mathematical workflow (schematically illustrated in Fig.  
15 2-1), we characterized the self-initiated motion- and rest-specific spatiotemporal  
16 activity patterns in the dorsal cortex of neonates. The developmental stage (P3),  
17 analyzed in this study, is reminiscent of late gestation (preterm) stage in human  
18 babies, when (i) long-range neuronal projections are still developing, and (ii) the  
19 electrical brain activity consists of developmentally unique, intermittent events,  
20 believed to guide activity-dependent brain wiring (Omidvarnia et al., 2014; Vanhatalo  
21 et al., 2002).

22

## 23 **Materials and methods**

### 24 *Mice*

25 All experiments were conducted in accordance with institutional animal welfare  
26 guidelines and were approved by the state government of Baden-Württemberg,

1 Germany. Because during the first postnatal week the rapidly developing rodent  
2 cortex is known to traverse several developmental states (Kirischuk et al., 2017), for  
3 the sake of consistency we focused on a defined animal age (P3), characterized by  
4 cortical early network oscillations (Adelsberger et al., 2005; Garaschuk et al., 2000;  
5 Kirmse et al., 2015) with their developmentally unique intermittent activity, first  
6 appearance of spontaneous activity patterns in the prefrontal cortex (Brockmann et  
7 al., 2011) but immature callosal projections (Son et al., 2017; Wang et al., 2007). In  
8 accord with mentioned above human studies (Omidvarnia et al., 2014), we use the  
9 term network as a functional concept referring to a set of brain regions displaying  
10 simultaneous activity or a high degree of functional connectivity, as measured by the  
11 mathematical paradigms used.

12 In line with the biometric planning, seven 3-day-old nestin-Cre x  
13 Ai95(RCL-GCaMP6f)-D and three age-matched wild type C57BL/6) mouse pups of  
14 either sex were used. Parent mouse lines B6.Cg-Tg(Nes-cre)1Kln/J and B6;129S-  
15 Gt(ROSA)26Sortm95.1(CAG-GCaMP6f) Hze/J were originally obtained from Jackson  
16 Laboratory (stock № 003771 and stock № 024105, respectively) and were bred on  
17 the C57BL/6 background.

18

### 19 *Animal preparation for in vivo Ca<sup>2+</sup> imaging*

20 Mouse pups were anesthetized with isoflurane (2.5% for induction, 1-2% for the rest  
21 of surgery). The skin above the dorsal part of the skull was cut away, the connective  
22 tissue was gently peeled off and the custom-made ring-like plastic chamber was  
23 glued to the skull. Xylocaine gel (2%) was applied to the wounded skin edges. To  
24 prevent the skull from drying out, it was covered with agarose (1-2%) dissolved in  
25 standard Ringer's solution containing (in mM): NaCl 125, KCl 4.5, MgCl<sub>2</sub> 1, CaCl<sub>2</sub> 2,  
26 NaHCO<sub>3</sub> 26, NaH<sub>2</sub>PO<sub>4</sub> 1.25, Glucose 20, pH 7.4. The procedure described above

1 lasted  $23 \pm 3.8$  min ( $n=7$  mice). Thereafter, the isoflurane anesthesia was terminated  
2 and the animal was allowed to recover on a warming plate ( $34^{\circ}\text{C} - 36^{\circ}\text{C}$ ) for at least  
3 one hour. This well established (Ackman et al., 2012; Adelsberger et al., 2005; Che  
4 et al., 2018; Dooley et al., 2020; Hagihara et al., 2015) protocol provided stable  
5 recording conditions with similar ongoing *in vivo* activity patterns, observed within  
6 and across experimental animals (Fig. 2-2).

7

### 8 *In vivo large-scale single-photon $\text{Ca}^{2+}$ imaging*

9 After recovery the animal, resting on a warming plate, was transferred into the  
10 imaging setup and head-fixed under the MVX10 Research Macro Zoom Microscope  
11 equipped with an LED source for excitation (Thorlabs, central wavelength 470 nm),  
12 470/40 nm excitation filter, 495LP beam splitter, 525/50 nm emission filter (all from  
13 Chroma Technology), the Zyla 4.2 sCMOS camera (Andor Technology) and Andor  
14 Solis software for image acquisition. Animal's limbs were free to interact with each  
15 other and with the surface of the warming plate. Both the left and the right  
16 hemispheres were imaged simultaneously through the intact skull at  $256 \times 256$  pixel  
17 resolution ( $1 \text{ pixel} \approx 25 \times 25 \mu\text{m}^2$ ) and 11 ms/frame for half an hour (three consecutive  
18 10-min-long acquisition series). During the recordings, mice spent  $70.6 \pm 12\%$  of their  
19 time in a state without any apparent movement (Fig. 2C and D). This behavior is very  
20 similar to that of control neonatal mice (Fig. 3e in (Adelsberger et al., 2005)) and  
21 differs substantially from the one indicating distress (e.g. sudden movements,  
22 vocalization, and urination) (Castelhano-Carlos et al., 2010).

23

24 **The nature of recorded  $\text{Ca}^{2+}$  signals.** To understand the nature of the recorded  
25 large-scale  $\text{Ca}^{2+}$  signals we imaged them in the temporal cortex using high resolution  
26 two-photon microscopy in brain slices because this cortical region shows similar

1 spontaneous large-scale  $\text{Ca}^{2+}$  signals *in situ* and *in vivo* (Adelsberger et al., 2005).  
2 To do so, at the end of *in vivo* imaging experiments horizontal 500- $\mu\text{m}$ -thick slices  
3 were prepared from three P3 nestin-Cre x Ai95(RCL-GCaMP6f)-D mice as described  
4 earlier (Adelsberger et al., 2005). As the nestin promoter, driving the Cre  
5 recombinase activity in our mice, is expressed in both neuronal and glial precursors,  
6 both neurons and astrocytes expressed GCaMP6f (Fig. 2-3). In addition, astrocytes  
7 were stained by bathing the slice for 10 min at 37 °C in the standard Ringer's solution  
8 (composition see above) containing the red fluorescent dye sulforhodamine 101  
9 (S101, 3  $\mu\text{g}/\text{ml}$ ; Fig. 2-3A) (Adelsberger et al., 2005). To speed up the data  
10 acquisition, we selected fields of view with a rather high density of astrocytes.  $\text{Ca}^{2+}$   
11 imaging was performed at 32-34 °C using a two-photon microscope (Olympus  
12 Fluoview 1000, Olympus) coupled to a mode-locked Ti-Sapphire laser working at a  
13 wavelength of 710-990 nm (MaiTai, Spectra Physics) and equipped with a water-  
14 immersion objective (Olympus 60x, 1.0 NA). The emission signals of GCaMP6f and  
15 S101 were split by a 570 nm dichroic mirror and sent through the BP 536/40 and BP  
16 630/92 filters, respectively. We analyzed ROIs containing individual cells (neurons  
17 and astrocytes) as well as the large-scale ROIs (176 x 176  $\mu\text{m}$ ), covering the entire  
18 imaging frame. The latter contained the mixed signal alike our *in vivo* data. ROIs for  
19 each individual neuron or astrocyte were drawn manually. The respective traces  
20 were calculated by averaging all pixels inside the ROI.  $\text{Ca}^{2+}$  signals were detected by  
21 the Matlab (R2016b) peak detection function after smoothing original traces (moving  
22 average function, 1 s moving window size). As shown in Fig. 2-3B, the  $\text{Ca}^{2+}$  signals  
23 recorded from large-scale ROIs closely resembled signals of individual neurons,  
24 while astrocytes either showed no  $\text{Ca}^{2+}$  signals at all (88 of 119 analyzed cells) or  
25 showed  $\text{Ca}^{2+}$  signals with much slower kinetics (31 of 119 analyzed cells; Fig. 2-3C).  
26 Note that in astrocytes the frequency of spontaneous  $\text{Ca}^{2+}$  signals is much lower than



1 in neurons (Adelsberger et al., 2005; Nimmerjahn et al., 2004; Tian et al., 2006), thus  
2 explaining the rare appearance of the latter in our recordings. The similarity among  
3 traces was determined using the Pearson correlation coefficient. Correlation  
4 coefficients among neurons and between each neuron and the large-scale ROI were  
5 high, quite opposite to those obtained when correlating the respective astrocytic data  
6 (Fig. 2-3D). The median correlation coefficients obtained when comparing individual  
7 neurons with the respective large-scale ROIs were as high as  $0.9 \pm 0.1$  ( $n=190$   
8 neuron/large ROI pairs; Fig. 2-3E). The much lower coefficients were obtained when  
9 conducting the same comparison for astrocytes ( $0.29 \pm 0.27$ ,  $n=119$  astrocyte/large  
10 ROI pairs).

11 We concluded, therefore, that *in vivo*  $Ca^{2+}$  signals analyzed in the present study are  
12 of neuronal origin. This conclusion is further supported by the fact that between P0  
13 and P3 neurons represent  $\sim 88\%$  of all cells in the rodent cortex (Bandeira et al.,  
14 2009).

15

#### 16 *Recordings of animal's movement*

17 Animals were imaged with a monochrome infrared (IR) light-sensitive camera. IR  
18 LED (950 nm) was used for illumination. To remove the salt-and-pepper noise, the  
19 image sequence (720x480 pixels, 29 Hz) was filtered with a median filter of kernel  
20 size 3 x 3. Subsequently, adjacent frames were pixel-wise subtracted from each  
21 other thus transforming the original image sequence into an image sequence  
22 containing the information about the temporal changes within the field of view (Lipton  
23 et al., 1998). For a given resulting image, the sum of absolute values of all pixels was  
24 taken as a measure of instantaneous body motion. Subsequently, the movement  
25 trace was upsampled using Matlab's 1D interpolation function to match the sampling  
26 rate of the  $Ca^{2+}$  signals ( $\sim 91$  Hz), plotted over time, and normalized to the maximum

1 recorded value. The breathing-related motion artifacts were identified by the back-to-  
2 back comparison of the animal behavior and the corresponding movement trace. For  
3 each recording, the threshold was selected such that these artifacts were discarded.  
4 On average the threshold was ~6% of the maximum recorded value and was used to  
5 create a binary signal, where all ones corresponded to the motion period and all  
6 zeros corresponded to the resting state (Fig. 2-4). The on/off switching of the 470 nm  
7 excitation light, recorded by both cameras, was used to synchronize the imaging of  
8  $\text{Ca}^{2+}$  and movement signals. In addition, we defined the time window including one  
9 second before the movement onset and three seconds after the end of the  
10 movement (corresponding to the decay time of the eventual movement-evoked  $\text{Ca}^{2+}$   
11 signals) as a transition state. With this procedure, the behavior of the animal was  
12 automatically subdivided into three different states: motion, rest, and transition.  
13 As the motion state potentially contained either spontaneous muscle twitches  
14 (Blumberg, 2010) or generalized movements, in a separate series of experiments we  
15 recorded nuchal muscle electromyogram (EMG (Seelke et al., 2005)) simultaneously  
16 with imaging body movements. Note that at P3 the EEG traces are discontinuous  
17 thus providing no information about the vigilance states (Blumberg et al., 2014;  
18 Jouvet-Mounier et al., 1970; Rensing et al., 2018). For EMG recordings a stainless  
19 steel wire (type SS-3T, Science Products GmbH, Hofheim, Germany) was used. Two  
20 to five mm of the insulation were stripped off and the insulation-free ends of the wire  
21 were gently inserted subcutaneously and placed bilaterally on the top of the neck  
22 muscles. After the correct position of the wires has been verified, the wires were fixed  
23 to the ring-like plastic chamber (see above) with UV-cured dental cement. EMG data  
24 were recorded at 1 kHz (0.3-500 Hz band-pass filter) using the Powerlab differential  
25 amplifier (ADInstruments Ltd, Oxford, United Kingdom).

1 Movement binary signal was created from the EMG signal using signal envelope  
2 analysis (Oppenheim et al., 1999). The normalized cross-correlation between the  
3 movement signals extracted from the imaging and the EMG data showed peak  
4 values of 0.6-0.85 (n = 9 recording in 3 mice) suggesting that both signals reflect the  
5 structure of the animal's movement in a consistent way. Note, however, that some  
6 tiny movements, as well as limb twitches, likely remain unrecognized by either one or  
7 even both techniques (Seelke et al., 2005). This fact and the fragmentation of sleep  
8 in the neonatal mice (Fig. 2-4, see also Fig. 3A in (Blumberg et al., 2014)) made  
9 unequivocal identification of active and quiet sleep periods difficult. Next, we  
10 separately used EMG- and imaging-based data sets of individual animals to  
11 construct the distributions of the durations of movement episodes. Both data sets  
12 identified the first peak at 350-600 ms, followed by a local minimum at 700-800 ms.  
13 Based on this data we chose 750 ms as an empirical border between spontaneous  
14 muscle twitches and generalized movements. In our hands, muscle twitches  
15 represented  $39.5 \pm 14$  % of all movement events (n=6 mice) and the fraction of time  
16 covered by muscle twitches ranged between 5% and 16% (median per mouse) of the  
17 total movement time. We concluded, therefore, that under our experimental  
18 conditions  $Ca^{2+}$  signals recorded during the animal's movement mainly reflect the  
19 ones associated with generalized movements.

20

### 21 *Analyses of spontaneous cortical activity*

22 If not otherwise indicated, data analyses started with reducing the image size to  
23 128x128 pixels using 2 x 2 binning and motion correction (Matlab R2016b image  
24 registration toolbox; Fig. 2-1). We used full-band data for all analyses, no frequency  
25 filtering was applied. Because our (see Movie 2-1 recorded in WT mice) as well as  
26 literature (Kozberg et al., 2016) data show that localized neural activity in neonatal

1 mice does not evoke local functional hyperemia (in contrast to the adult brain), no  
2 hemodynamic correction was applied.

3 **ROI detection based on Nonnegative Matrix Factorization (NMF).** Pixels that  
4 showed a coherent change in fluorescence intensity were grouped into ROIs using  
5 the NMF algorithm, running on a full data set. According to NMF, a given data matrix  
6  $X$  is factorized into two matrices  $W$  and  $H$  containing spatial filters ( $W$ ) and the  
7 corresponding time information ( $H$ ):  $X = WH$ ,  $W_{ik} > 0$  &  $H_{kj} > 0$ .  $W$  and  $H$  can be  
8 calculated by minimizing a cost function,  $\min_{W,H} \|X - WH\|_F$ . In the case of the low-  
9 rank NMF, the rank ( $k$ ) of  $W$  and  $H$  is set to be smaller than the dimension of  $X$ . To  
10 minimize the cost function we have chosen the alternating least-squares algorithm  
11 (Berry et al., 2007). The initialization method was based on ICA (Fig. 2-1). Selection  
12 of the rank for  $W$  and  $H$  relied on PCA singular values. We found that selecting 300  
13 components in the PCA insured that the explained variance in the data was  $\geq 95\%$   
14 whilst data noise was significantly reduced.

15 The 300 spatial filters were inspected by eye. Filters resembling either the blood  
16 vessel pattern or the whole brain image contaminated by blood vessels (e.g., Figs. 2-  
17 5A and 2-5B, Movies 2-1 and 2-2), likely reflecting movement artifacts, were  
18 discarded. The total number of such filters was in the range of  $95 \pm 34$ . The total data  
19 variance, explained by the discarded data, amounted to  $36 \pm 3\%$  (mean  $\pm$  S.E.M,  $n=7$   
20 mice). The remaining filters contained groups of active neighboring pixels, clearly  
21 discernible from the noisy background (e.g., Fig. 2-5C). Sobel edge detector  
22 algorithm (Lim, 1990) was used to define the border between the active and  
23 background pixels. Finally, the filters were binarized using the threshold value of  
24 fourfold the SD of the corresponding background noise (see above). Groups of  
25 connected pixels with  $n > 10$  pixels were defined as ROIs. The filters containing one  
26 ROI were called **single ROI filters** and the ones with more than one ROI were called

1 **multi-ROI filters.** To create an ROI-based frequency map, each ROI was weighted  
2 by ascribing a value equal to the number of peaks detected in its temporal domain  
3 ( $H$ ). For peak detection traces corresponding to spatial filters ( $W$ ) were thresholded  
4 at 95% of their maximal amplitude. Finally, the weighted ROIs were superimposed to  
5 create a color-coded ROI-based frequency map (e.g. Fig. 2A).

6

7 **Calculating the association between fluorescence intensity in C57BL/6 mice**  
8 **and the body movement.** Using the result of NMF analysis, the data was  
9 reconstructed based on those spatial filters which only contain the blood vessel  
10 pattern or the whole brain image contaminated by the blood vessel pattern  
11 (exemplified in Figs. 2-5A and 2-5B), likely reflecting movement artifacts. Using the  
12 reconstructed video, the trace of the global fluorescence intensity was calculated by  
13 averaging the intensity of all pixels within the recorded brain area. Taking this trace,  
14 the Gaussian mixture model with 2 Gaussians was used to separate large intensity  
15 changes from small baseline fluctuations. The intercept of two Gaussians was taken  
16 as the separation threshold. Next, the calculated trace was binarized using the  
17 threshold value, returning a sequence of individual blocks of activity. Finally, the  
18 association between the binary fluorescence intensity signal and the binary  
19 movement signal was calculated using the following formula:

20 
$$\frac{\sum_{i=All\ blocks} \left( \frac{\sum_{i=individual\ block\ size(binary\ body\ motion)}^1}{\sum_{i=individual\ block\ size(binary\ fluorescence\ intensity)}^1} \geq 5\% \right)}{\sum_{i=All\ blocks} 1}$$

21

22 **Symmetry maps.** For calculation of the cortical symmetry maps, one hemisphere  
23 was mirrored to another against the mid-sagittal plane and all ROIs belonging to  
24 each multi-ROI filter were examined pair-wise by calculating their two-dimensional  
25 correlation coefficients. A pair of ROIs was considered symmetric if the correlation

1 coefficient was  $\geq 0.5$ . Spatial filters which contained only symmetric ROIs were  
 2 classified as **total symmetry filters** and filters with at least one pair of symmetric  
 3 ROIs were classified as **semi-symmetry filters**. Further, according to their  
 4 corresponding time information (matrix  $H$ ) and the animal state, the symmetry filters  
 5 were subdivided into three categories: motion, rest, and transition. Superpositions of  
 6 filters of a given class and category were used to produce behavioral state-specific  
 7 symmetry maps.

8

9 **Wave analyses.** To detect propagating  $\text{Ca}^{2+}$  waves the image sequences were  
 10 processed by the nonparametric spectral estimation method: Multi-channel Singular  
 11 Spectrum Analysis (MSSA; (Golyandina and Usevich, 2010)). Before being reshaped  
 12 into a two-dimensional space, full-band data were down-sampled by a factor of 10 in  
 13 the temporal domain. The resulting matrix  $D_{n \times p}$  was centered in the time domain by  
 14 subtracting the mean value of each pixel. Thus,

$$15 \quad D_{n \times p} = \begin{bmatrix} x_{11} & x_{21} & \dots & x_{p1} \\ \vdots & \vdots & \dots & \vdots \\ x_{1n} & x_{2n} & \dots & x_{pn} \end{bmatrix},$$

16 where  $n$  is the number of samples in time and  $p$  is the number of pixels in each  
 17 image.

18 According to the MSSA algorithm, we determined the embedding matrix  $M$  and  
 19 covariance matrix  $C$  as

$$20 \quad M_{N' \times pk} = \begin{bmatrix} x_{11} & x_{12} & \dots & x_{21} & x_{22} & \dots \\ x_{12} & x_{13} & \dots & x_{22} & x_{23} & \dots \\ x_{13} & \vdots & \dots & x_{23} & \vdots & \dots \\ \vdots & x_{1n} & \dots & \vdots & x_{2n} & \dots \\ x_{1n} & 0 & \dots & x_{2n} & 0 & \dots \end{bmatrix}, \text{ where } N' = n - k + 1, \text{ and } k \text{ is a lag shift.}$$

$$21 \quad C_{pk \times pk} = \frac{1}{N'} M' M.$$

22 By eigen decomposition of the covariance matrix  $C$ , principle vectors and principle  
 23 components were calculated. In the MSSA, each principle vector describes an

1 oscillatory component in the data set whereas principle components represent the  
2 corresponding weighting coefficients. The k value (lag shift) was set to 15 s.  
3 Data were reconstructed (MSSA (Golyandina and Usevich, 2010)) based on a  
4 subgroup of components (sorted components 20-150<sup>th</sup>). The remaining components  
5 represented either noise or slow baseline drifts. Finally, the reconstructed data were  
6 spatially thresholded to obtain the corresponding binary mask of each frame.  
7 Thresholding was based on fitting Laplace distribution to the reconstructed data. As a  
8 threshold, we selected a fourfold of scale parameter of the estimated Laplace  
9 distribution. The location, in which the activity was observed in the first frame of each  
10 individual wave, was defined as its pacemaker region. Populations of connected  
11 pixels were treated as objects and dynamics of each object in time represented a  
12 single wave. The distance traveled by each wave was characterized by the sum of  
13 displacements of the corresponding object's center of mass. The waves were divided  
14 into two groups: (1) stationary waves with the center of mass moving less than 200  
15  $\mu\text{m}$  and (2) propagating waves with the center of mass moving more than 200  $\mu\text{m}$ . To  
16 calculate the speed of a wave we divided the total distance traveled by the respective  
17 time. Further, we counted the waves propagating within a given cortical region and  
18 calculated the fraction of waves occurring during the motion and resting periods,  
19 respectively. A similar procedure was applied to calculate the fraction of waves  
20 propagating between any two cortical regions. One animal (Mouse 6 in Fig. 2-2) was  
21 excluded from the above analyses because compared to other mice, this data set  
22 contained more brief motion periods disrupting the resting period and thus making  
23 the analysis of wave propagation and functional connectivity impossible.

24

25

26

## 1 *Map of simultaneously active cortical regions*

2 To identify brain regions synchronously active during the movement and the resting  
3 states, spatial filters in multi-ROIs obtained from NMF analysis (see above) were  
4 processed according to the time information (matrix  $H$ ) and the animal state. Then,  
5 the subregions from each multi-ROI were assigned to the anatomical regions based  
6 on the location of their center of mass. For any multi-ROI filter, each pair of  
7 simultaneously active subregions (within each cortical region or between the two  
8 distinct cortical regions) was represented by an entry in the matrix (10 x 10 - each  
9 row or column corresponds to one of the cortical regions (see Fig. 5-1)). Such entry  
10 was made each time when the two subregions were simultaneously active. This  
11 procedure was repeated for all multi-ROIs in motion and resting states providing two  
12 matrices. Then each matrix was normalized to the sum of both matrices and values  
13 below 50% were removed, to focus on interactions, predominant for each state. The  
14 median of three matrices (three 10-min-long image series) was taken as a  
15 representative map for each mouse (Fig. 5-1C) and the median of all maps from  $n =$   
16 6 mice was depicted in Fig. 5-1D.

17

## 18 *Functional connectivity maps*

19 For calculating direct connectivity maps, input data were binned 5 by 5 pixels,  
20 temporally down-sampled by a factor of 10, and centered in the time domain by  
21 subtracting the mean value of each pixel. Thereafter, the connectivity maps were  
22 calculated separately for resting and motion periods by using the sparse partial  
23 correlation algorithm (Smith, 2012; Smith et al., 2011). Assuming that data are drawn  
24 from a multivariate Gaussian distribution, elements of the precision matrix  $\Sigma^{-1}$   
25 explain partial covariance in a given data set. Sparsity constraint was introduced by  
26 adding an extra penalty term to the likelihood function. To calculate the sparse partial



1 covariance one has to maximize the penalized log-likelihood  $L$  (Friedman et al.,  
2 2008),

$$3 \quad \operatorname{argmax}_{\theta} L = \log \det(\theta) - \operatorname{tr}(S\theta) - \gamma \|\theta\|_1,$$

4 where  $\theta = \Sigma^{-1}$ , and  $S$  is the empirical covariance matrix

5  $\|\cdot\|_1$ , is  $l_1$  norm and  $\gamma$  is a sparseness tuning parameter.

6 The sparse partial covariance was calculated with a range of different  $\gamma$  values. The  
7 smaller  $\gamma$  values provide a more dense connectivity pattern, whereas the larger  $\gamma$   
8 values increase sparseness in the connectivity map by removing weak connections  
9 between the nodes. After obtaining the direct connectivity map, pixels belonging to  
10 specific cortical regions were identified using the corresponding anatomical map of  
11 the brain (like the one shown in Fig. 1A). Partial covariances between pixels of each  
12 specific cortical region were summed up giving the value  $\alpha_{ij}$ , where  $\alpha_{ij}$  reflects the  
13 strength of the connectivity within the given cortical region if  $i=j$ . Similarly, partial  
14 covariances between pixels belonging to a pair of specific cortical regions were  
15 summed up, contributing those values of  $\alpha_{ij}$  ( $i \neq j$ ), where  $\alpha_{ij}$  reflects the strength of the  
16 connectivity between the two different cortical regions. Finally, all values were  
17 normalized to the maximal  $\alpha_{ij}$  value.

18

### 19 *Statistical analyses*

20 Statistics was performed using JASP and SPSS software. The normality of the data  
21 distribution was tested using the Shapiro-Wilk test. The two-tailed paired Student's  $t$ -  
22 test was used for pair-wise comparisons of normally distributed data sets. For pair-  
23 wise comparisons of not normally distributed data, Wilcoxon signed-rank test was  
24 applied. One-way or two-way repeated measures ANOVA (rANOVA) was used for  
25 comparing more than two normally distributed dependent variables. In the case of not  
26 normally distributed data, the Friedman test was used. In rANOVA sphericity

1 assumption was tested using Mauchly's test and in case of sphericity violation,  
2 Greenhouse-Geisser correction was applied. All ANOVAs, which show significant  
3 results, were followed by a post-hoc test with Hold-Sidak correction for multiple  
4 comparisons. For all tests, differences were considered significant if  $P < 0.05$ .

5 If not otherwise indicated, data are presented as median  $\pm$  interquartile range (IQR).  
6

## 7 **Results**

8 To monitor patterned neuronal activity in the dorsal cortex of neonates, we imaged  
9 non-anesthetized nestin-Cre x Ai95(RCL-GCaMP6f)-D mice through an intact skull  
10 with a high speed/ high quantum efficiency sCMOS camera. Although the use of  
11 genetically-modified mice is the only technique enabling large-scale cortical  $\text{Ca}^{2+}$   
12 imaging in this young age, the use of Cre-driver lines was recently questioned by the  
13 work of Steinmetz et al., reporting the presence of the epileptiform activity in different  
14 crosses of Ai93/Ai94 and various Cre-driver mice (Steinmetz et al., 2017). Unlike the  
15 Ai93/Ai94 mice, Ai95 mice used here do not contain tetracycline-controlled  
16 transactivator protein (tTA), reported to be neurotoxic (Han et al., 2012). Still, we  
17 searched for non-physiological activity in our mice using the same approach as  
18 Steinmetz et al. We analyzed fluorescence traces recorded in the frontal and the  
19 visual cortices and only found events with variable amplitude, duration, and shape  
20 (Fig. 1-1), in sharp contrast to large amplitude, brief duration, stereotyped shape  
21 epileptiform events recorded by Steinmetz et al. (see their Figs. 2, 3). The fact that  
22 we did not observe any pathological activity is consistent with the literature, showing  
23 that in used here B6.Cg-Tg(Nes-cre)1Kln/J mice expression of the Cre recombinase  
24 becomes widespread only during the perinatal development (around P0; (Liang et al.,  
25 2012)). With data acquired at P3, this leaves any pathology no time to develop.

1 Moreover, Steinmetz et al. never saw any aberrant activity before the age of at least  
2 7 weeks, again arguing against the presence of any pathology at P3.

3

#### 4 *Patterns of spontaneous activity in the dorsal cortex of neonates*

5 As shown in Fig. 1A-C, we observed diverse patterns of endogenous activity ranging  
6 from localized signals, involving one or several anatomical regions (Fig. 1B, upper  
7 panel) to large distributed signals, covering almost the entire dorsal cortical surface  
8 (Fig. 1B, middle panel). Placing regions of interest onto major anatomical regions of  
9 the dorsal cortex (i.e. visual, auditory, somatosensory, and motor cortices) revealed  
10 rich patterns of recurring changes in  $\Delta F/F$  in each studied region (Fig. 1C).  
11 Simultaneous recording of animal movements (consisting at this age of muscle  
12 twitches and generalized movements, see Materials and methods for details about  
13 the estimation of movement's nature) by means of an infrared imaging camera (a  
14 gray trace in Fig. 1C; Fig. 2-4), revealed the presence of changes in  $\Delta F/F$  during both  
15 moving and resting states.

16 To understand the nature of the observed changes in  $\Delta F/F$ , pixels that showed a  
17 coherent change in fluorescence intensity were grouped into ROIs using NMF (see  
18 Materials and methods), running on a full 10-min-long set of data. The analyses  
19 returned 3 typical ROI patterns (so-called spatial filters) resembling (i) blood vessel  
20 pattern (Fig. 2-5A), (ii) the whole brain image contaminated by the blood vessel  
21 pattern (Fig. 2-5B), or (iii) groups of active neighboring pixels, clearly discernible from  
22 the background (Fig. 2-5C).

23 The first two ROI patterns were also seen in wild type C57BL/6 mice (n=3), where  
24 95% of them were associated with animal's movement, whereas the third one was  
25 observed only in GCaMP6f-expressing nestin-Cre x Ai95(RCL-GCaMP6f)-D mice  
26 (compare Movies 2-1 and 2-2). Thus, although distributed fluorescence signals, seen

1 in nestin-Cre x Ai95(RCL-GCaMP6f)-D mice (Fig. 1B, middle panel), likely also  
2 include a Ca<sup>2+</sup>-sensitive component, in-depth analysis of these events was precluded  
3 by contaminating movement artifacts and, if any, artifacts, related to flavoprotein  
4 autofluorescence and confounding hemoglobin absorption.

5

### 6 *Behavioral state-dependent patterns of local cortical activity*

7 In the subsequent analyses, we thus concentrated on the properties of localized  
8 activity, which mainly reflected Ca<sup>2+</sup> signaling in the underlying neuronal population  
9 (Fig. 2-3, see Materials and methods).

10 Regarding the localized activity, the NMF algorithm identified either “single ROIs”, in  
11 which all coherently active pixels were immediately adjacent to each other, or “multi-  
12 ROIs”, in which coherently active pixels were distributed in patches throughout the  
13 dorsal cortex (see Materials and methods for details). Next, we constructed ROI-  
14 based frequency maps of the local spontaneous activity during the motion and the  
15 resting periods (Fig. 2A and B; see Materials and methods for details). To clearly  
16 discriminate between the motion and the resting states we separated them by  
17 transition periods including one second before the movement onset and three  
18 seconds after the end of the movement (Fig. 2C and D). Analysis of the amount of  
19 variance (Pedregosa et al., 2011) in the data related to each state (rest, transition  
20 (before and after the movement), generalized movements, and muscle twitches)  
21 showed that the amount of variance related to twitches was  $0.2 \pm 0.6\%$  and thus  
22 much less than that related to generalized movements ( $61.98 \pm 9.39\%$ ; Fig. 2-6),  
23 probably due to the short duration of twitches (see Materials and methods).  
24 Therefore, the motion-related frequency maps almost exclusively explain the activity,  
25 happening during the generalized movements. Overall, the 3-day-old mice moved  
26 only  $32 \pm 18.5\%$  of the recording time (Fig. 2D), thus spending most of their time in a

1 state with no detectable motion. This is consistent with our earlier data described in  
2 ref. (Adelsberger et al., 2005).

3 On average, coherently active local cortical subregions belonging to either single or  
4 multi-ROIs covered the areas of approximately  $0.2 \text{ mm}^2$  (Fig. 2-7) and the size of  
5 these areas was similar during different behaviors (rest:  $0.21 \pm 0.06$ , generalized  
6 movements:  $0.17 \pm 0.03$ , muscle twitches:  $0.18 \pm 0.06$ ). However, the resulting ROI-  
7 based frequency maps differed dramatically between the motion and rest (Fig. 2A).

8 During the motion period, activity was mostly localized to the somatosensory and a  
9 lesser extent motor cortex, whereas at rest it was predominantly found in the visual  
10 and auditory cortices as well as a rim of lateral cortical areas likely including temporal  
11 and parietal cortices.

12 Noteworthy, the distinct behavioral state-specific activity patterns were highly  
13 conserved across experimental animals (Figs. 2-2 and 2B). To quantify this  
14 difference, we calculated spatial correlation coefficients (Lewis, 1995) for ROI-based  
15 frequency maps recorded during either the same or different behavioral state. First,  
16 we compared the maps calculated for three 10-min-long consecutive recordings in  
17 the same animal (Fig. 2E) and then compared the median values obtained in 7 mice  
18 (Fig. 2F). For all animals tested, spatial correlation coefficients were high for “within  
19 the state” comparison and much lower when comparing the maps across the different  
20 states. From a statistical point of view (Fig. 2F), the coefficients were highest during  
21 the motion state and somewhat lower during the resting state, whereas the  
22 comparison between motion and rest produced very small correlation coefficients.  
23 The differences between the three groups were statistically significant (One-way  
24 Repeated Measure ANOVA  $F_{2, 12} = 71.1$ ,  $P < 10^{-3}$  followed by Holm-Sidak multiple  
25 comparisons test; motion vs. rest  $P = 10^{-3}$  and  $P < 10^{-3}$  for the two remaining  
26 comparisons). The almost inverse spatial maps of the local activity during the two

1 behavioral states suggest that cortical networks involved in generation and  
2 propagation of this spontaneous activity are tightly controlled in a state-dependent  
3 manner.

4

#### 5 *Hemispheric asymmetry of the local cortical activity*

6 Next, we used the multi-ROI filters to analyze whether the patterns of coherent  
7 spontaneous activity were hemisphere-symmetric (Fig. 3). To do so, for each  
8 recording we constructed the total symmetry map (containing only hemisphere-  
9 symmetric ROIs) and the semi-symmetry map (containing at least one pair of  
10 hemisphere-symmetric ROIs, see Materials and methods) and compared these maps  
11 across the animals and the behavioral states. In general, only  $6 \pm 2.4\%$  of all multi-  
12 ROIs showed a stringent hemispheric symmetry (Fig. 3A-C). Another  $9 \pm 7.3\%$  of  
13 multi-ROIs were partially symmetric, whereas  $83 \pm 6.5\%$  were asymmetric (the  
14 superposition of these ROIs would look similar to Fig. 2A and 2B). The vast majority  
15 ( $73 \pm 22.7\%$ ) of totally symmetric ROIs was observed during the motion period, and  
16 only some  $10.3 \pm 14\%$  of symmetric activity patterns happened at rest (Fig. 3D-F).  
17 Similar results were obtained for semi-symmetry maps, with  $75 \pm 29\%$  of respective  
18 activity patterns observed during the motion and  $12 \pm 28\%$  observed during the  
19 resting period (Fig. 3G-I). Because the cortical activity was more frequent during the  
20 motion period (Fig. 2A and 2B), we normalized the number of total/semi-symmetry  
21 events during motion/rest to the respective total number of events. The normalized  
22 fractions of events remained low (semi-symmetry:  $9 \pm 2\%$  and  $3.4 \pm 1\%$  and total  
23 symmetry:  $6 \pm 1\%$  and  $1.5 \pm 0.5\%$  during motion and rest, respectively; mean  $\pm$   
24 S.E.M). On average, total/semi-symmetry events were  $2.3 \pm 0.5$  times more frequent  
25 during motion than during rest. Because at the age studied here the callosal  
26 projections, providing interhemispheric communication, are immature (Son et al.,

1 2017; Wang et al., 2007), more frequent occurrence of symmetric events during  
2 motion is likely caused by peripheral or subcortical structures.

3 Subsequently, we asked whether regions contributing to hemisphere-symmetric  
4 neuronal activity differ between the two behavioral states. For both total and semi-  
5 symmetry maps, the fraction of active pixels amounted to less than 22% of all imaged  
6 cortical pixels (Fig. 4A-D).

7 Still, the fraction of pixels active during the motion period ( $17.2 \pm 3.9\%$  and  $21 \pm$   
8  $11.1\%$ , for total and semi-symmetry maps, respectively) was significantly higher than  
9 the fraction of pixels active at rest ( $2.5 \pm 5.9\%$  and  $7 \pm 21.3\%$ ; Paired student's t-test;  
10 total symmetry: motion vs. rest,  $t_5 = 7$ ,  $P < 10^{-3}$ ; semi-symmetry: motion vs. rest,  $t_5 =$   
11  $5.7$ ,  $P = 2 \times 10^{-3}$ ). Although we did identify some anatomical regions involved in totally-  
12 and semi-symmetric activities during both behavioral states (the most prominent  
13 being the retrosplenial cortex, marked with an arrow in Fig. 4B), in general, the  
14 regions involved in these kinds of activity differed between the resting and motion  
15 periods. Thus, for the total symmetry maps (Fig. 4E) there were virtually no pixels  
16 active both during motion and rest ( $0 \pm 8\%$ ). For the semi-symmetry maps,  $11 \pm$   
17  $41.8\%$  of pixels active during motion were also active at rest (Fig. 4F).

18 Taken together, the data clearly documents a profound hemispheric asymmetry of  
19 spontaneous neuronal activity at this developmental state. This lack of symmetry is  
20 likely due to the immature corpus callosum (Son et al., 2017; Wang et al., 2007),  
21 known to coordinate synchronous patterns of activity between hemispheres (McVea  
22 et al., 2016). At the same time, we show that in the minority of cases hemisphere-  
23 symmetric activity patterns do occur and identify the retrosplenial cortex as a region,  
24 frequently involved in such type of activity during both the movement and the resting  
25 periods.

26



1 *Behavioral state-specific maps of simultaneously active cortical subregions*

2 Multi-ROI filters, automatically provided by a nonnegative matrix factorization  
3 algorithm, contain synchronously active areas. We used this property to visualize  
4 brain regions active simultaneously during either the movement or the resting states.  
5 First, we determined the anatomical location of all multi-ROI subregions using the  
6 map similar to the one shown in Fig. 1A but including also the retrosplenial cortex  
7 (Fig. 5-1A). Subsequently, we constructed the state-dependent maps (see Materials  
8 and methods for details), in which each edge connected brain regions, which were  
9 consistently simultaneously active in a behavioral state-specific manner within and  
10 across experimental animals (Fig. 5-1B-D). The circles indicate instances in which  
11 pairs of active subregions of a multi-ROI were located within the same anatomical  
12 region.

13 In both behavioral states, the simultaneously active subregions were found either  
14 close to each other (e.g., within the same anatomical region) or up to several mm  
15 apart, as exemplified in Fig. 5-1B-D. In general, the center-to-center distances  
16 between simultaneously active subregions ranged from 0.3 to 5.8 mm (1<sup>st</sup> - 99<sup>th</sup>  
17 percentile), with a median of  $2.1 \pm 0.4$  mm. When comparing median (per mouse)  
18 distances between the subregions, active during the motion and the resting states,  
19 no significant difference was found (motion:  $2.1 \pm 0.4$  mm, rest:  $2.2 \pm 0.2$  mm;  
20 Wilcoxon signed-rank test  $z = 0.52$ ,  $P = 0.69$ ,  $n=6$  mice; Fig. 5-2B). However,  
21 consistent with the general activity pattern described in Fig. 2, the regions  
22 contributing to the simultaneous activity map differed dramatically between the  
23 motion and the resting state. During the motion state, the synchronously active  
24 subregions were mostly located in the anterior (motor, somatosensory) cortical  
25 regions, shifting to the posterior (e.g., visual) cortical regions during the resting state  
26 (Fig. 5-1C and 5-1D). Interestingly, auditory and retrosplenial cortices contributed to



1 the map of simultaneous activity during both behavioral states. During the motion  
2 period, however, the retrosplenial cortex was predominantly active together with the  
3 motor cortex, while during the resting state it was predominantly active together with  
4 the visual cortex. The median simultaneous activity map obtained for all recorded  
5 mice ( $n = 6$ ; Fig. 5-1D) assured the solidity of the described above findings.

6

### 7 *Waves of activity propagating through the neonatal cortex*

8 So far when describing the observed activity patterns we have mostly considered  
9 their spatial dimension. With the temporal dimension added (see Materials and  
10 methods for details), the observed neonatal activity patterns turned into waves of  
11 activity either propagating in a given direction (e.g. Fig. 5A, left panel) or waxing and  
12 waning in magnitude and spatial area involved without any clear movement of the  
13 wave's center of mass (so-called stationary waves). Of all propagating waves  
14 observed, the majority ( $81 \pm 25\%$ ) were recorded during the motion period with a  
15 significantly smaller fraction of waves ( $19 \pm 25\%$ ; Paired student's t-test,  $t_5 = 3.2$ ,  $P =$   
16  $0.02$ ) being recorded at rest (Fig. 5B, upper panel). A similar trend was also observed  
17 for stationary waves (motion:  $81 \pm 36\%$ , rest:  $19 \pm 34\%$ ) but the difference did not  
18 reach the level of statistical significance (Fig. 5B, lower panel).

19 Next, we characterized the fractions of waves invading different anatomical regions  
20 (i.e. motor, somatosensory, auditory, visual, and retrosplenial cortices) of the right  
21 and the left hemispheres during the two behavioral states. For both propagating and  
22 stationary waves we did not observe any differences between the left and the right  
23 hemisphere for any condition tested (Repeated Measures ANOVA; Fig. 5-3A:  $F_{1,5} =$   
24  $3.5$ ,  $p=0.12$ ; Fig. 5-3B:  $F_{1,5} = 2.8 \times 10^{-4}$ ,  $p=0.98$ ; Fig. 5-3C:  $F_{1,5} = 4.1$ ,  $p=0.1$ ; Fig. 5-3D:  
25  $F_{1,5} = 10^{-3}$ ,  $p=0.98$ ). Therefore, for further analyses, we averaged the data from both  
26 hemispheres (Fig. 5C-F). During the motion state the highest fraction of both

1 propagating ( $23 \pm 4.5\%$ , Fig. 5C) and stationary ( $27 \pm 8.5\%$ , Fig. 5D) waves invaded  
2 the somatosensory cortex, whereas at rest the waves mostly invaded  
3 somatosensory, auditory, and visual cortices ( $9.8 \pm 4\%$ ,  $15.8 \pm 4.5\%$ ,  $11.8 \pm 6\%$  for  
4 propagating and  $13 \pm 9.5\%$ ,  $18.8 \pm 7.5\%$ ,  $9.8 \pm 4.5\%$  for stationary waves,  
5 respectively).

6 As to the wave frequency (Fig. 5-4A and C), it was highest in the somatosensory  
7 cortex ( $2.3 \pm 0.45$  waves/min for propagating and  $2.7 \pm 0.85$  waves/min for stationary  
8 waves) during motion and in the auditory, visual and somatosensory cortices  
9 (propagating:  $1.58 \pm 0.45$ ,  $1.18 \pm 0.6$ ,  $0.98 \pm 0.4$  waves/min; stationary:  $1.88 \pm 0.75$ ,  
10  $0.98 \pm 0.45$ ,  $1.3 \pm 0.95$ , waves/min, respectively) during rest. A similar frequency  
11 range was reported previously for different types of early intrinsic cortical activity in  
12 rats and mice (Adelsberger et al., 2005; An et al., 2014; Brockmann et al., 2011;  
13 Hanganu et al., 2006; Kirmse et al., 2015). To account for different sizes of the  
14 cortical areas under study, in the next step we normalized fractions of waves,  
15 invading different cortical regions, to the area of that particular region (Fig 5-5A and  
16 C). This analysis stressed the contributions of the somatosensory cortex to the  
17 activity during the motion and that of the auditory and visual cortices to the activity  
18 during the resting state.

19 Next, we analyzed locations of pacemakers (defined as described in Materials and  
20 methods), initiating a given type of activity. During the motion state, the pacemakers  
21 were mostly located in the somatosensory cortex ( $25.5 \pm 6.5\%$  of pacemakers for  
22 propagating (Fig. 5E) and  $27.3 \pm 8.5\%$  for stationary (Fig. 5F) waves, respectively).  
23 During the resting state the pacemakers were mostly distributed between the  
24 somatosensory, auditory, and visual cortices ( $11.8 \pm 5.5\%$ ,  $18 \pm 5\%$ ,  $13.5 \pm 7.5\%$  of  
25 pacemakers for propagating and  $13 \pm 10\%$ ,  $19 \pm 7.5\%$ ,  $9.8 \pm 5\%$  for stationary  
26 waves, respectively). The frequency, with which pacemakers appeared in different

1 cortical regions (Fig. 5-4B and D), was highest ( $2.55 \pm 0.65$  per min for propagating  
2 and  $2.73 \pm 0.85$  per min for stationary waves) in the somatosensory cortex during  
3 motion and in the auditory, visual and somatosensory cortices (propagating:  $1.8 \pm$   
4  $0.5$ ,  $1.35 \pm 0.75$ ,  $1.18 \pm 0.55$  per min; stationary:  $1.9 \pm 0.75$ ,  $0.98 \pm 0.5$ ,  $1.3 \pm 1$ , per  
5 min, respectively) during rest.

6 Normalization to the relative size of the cortical region showed that both for  
7 propagating and stationary waves the pacemaker density was highest in the  
8 somatosensory cortex during motion and in the auditory, visual and retrosplenial  
9 cortices during rest (Fig. 5-5B and D). The overall similarity in the distributions of  
10 waves, invading a given cortical area, and their pacemakers suggests that the  
11 majority of waves spread over rather short distances.

12 To test this assumption, we analyzed the distances traveled by the centers of mass  
13 of all propagating waves in our dataset. In general, the propagating waves spread  
14 over distances of 0.22 - 4.8 mm (1<sup>st</sup> – 99<sup>th</sup> percentile), with the median of  $0.47 \pm 0.02$   
15 mm ( $n = 6$  mice, not differentiating between motion and rest). The apparent speed of  
16 the center of mass ranged from 0.06 to 3.5 mm/s (1<sup>st</sup> – 99<sup>th</sup> percentile), with the  
17 median of  $0.38 \pm 0.05$  mm/s ( $n = 6$  mice). When comparing the properties of waves  
18 propagating during the motion and the resting states (Fig. 5-6), there was no  
19 significant difference between the distributions of median (per mouse) propagation  
20 distances (motion:  $0.47 \pm 0.02$  mm, rest:  $0.47 \pm 0.06$  mm; Paired student's t-test  $t_5 =$   
21  $0.34$ ,  $P = 0.75$ ,  $n = 6$  mice; Fig. 5-6B) but the respective propagation speed (Fig. 5-  
22 6D) was significantly different (motion:  $0.42 \pm 0.05$  mm/s, rest:  $0.28 \pm 0.13$  mm/s;  
23 Paired student's t-test  $t_5 = 4.3$ ,  $P = 0.01$ ,  $n = 6$  mice).

24 Thus, the spontaneous neuronal activity in the dorsal cortex of neonates contains a  
25 rich and spatially complex pattern of both stationary and propagating waves. The  
26 majority of the propagating waves are associated with the animal's movement,

1 whereas stationary waves seem to occur with roughly similar incidence during the  
2 movement and the resting periods. Interestingly, the waves of both types are  
3 triggered predominantly in the somatosensory or auditory cortices.

4

#### 5 *Functional connectivity map of early cortical activity*

6 Spontaneous correlated neuronal activity is believed to represent a functional  
7 template for activity-dependent maturation of intracortical connections and the  
8 refinement of functional units underlying information processing at adulthood  
9 (Hanganu-Opatz, 2010; Luhmann et al., 2016). To test for functional connectivity  
10 between the different cortical regions (Fig. 6), we used a sparse inverse covariance  
11 matrix estimation algorithm (see Materials and methods for details).

12 This analysis was shown to measure the direct association between the two brain  
13 regions removing the contributions caused by global or third-party effects (for more  
14 details on the method we refer the reader to ref. (Huang et al., 2010)).

15 The level of sparseness of the algorithm's outcome was controlled by the tuning  
16 parameter  $\gamma$ . Thanks to the monotone property of the algorithm used (Huang et al.,  
17 2010), increasing  $\gamma$  monotonically increases the level of sparseness of cortical  
18 connectivity at the expense of weaker connections. As, shown in Fig. 6-1, at  $\gamma=1.4$   
19 the sparsity of the connectivity map was reached for the first time for both the motion  
20 and resting states. Beyond  $\gamma=1.8$  the number of connections was strongly  
21 diminished. At  $\gamma=1.4$  we have observed direct functional connections within and in-  
22 between of many anatomical regions (Fig. 6, upper panel), defined as illustrated in  
23 Fig. 5-1A. However, the majority of these connections were weak (Fig. 6, upper  
24 panel) and disappeared with an increasing  $\gamma$  (Fig. 6, lower panel). The remaining  
25 strong connections emphasized the short-range intraregional connectivity as well as  
26 behavioral state-specific long-range connections between the more anterior regions

1 during motion. Interestingly, the method identified a strong and direct functional link  
2 between the ipsilateral retrosplenial and somatosensory cortices, present during both  
3 behavioral states, as well as some prominent behavioral state-specific connections  
4 (Fig. 6).

5 Together, these data reveal that in neonatal mice functionally connected cortical  
6 subregions are distributed through the entire dorsal cortical surface. The connectivity  
7 pattern is characterized by dense short-range connections, linking together different  
8 subregions of the given anatomical area and immediately adjacent cortical areas, as  
9 well as sparse long-range connections. The latter differ substantially between the  
10 resting and the motion state. These differences are highly conserved across  
11 experimental animals thus reflecting typical activity patterns of the neonatal brain.

12

### 13 **Discussion**

14 The current study reveals behavioral state-specific large-scale cortical maps in the  
15 dorsal cortex of neonates (Fig. 2). The motion- and rest-associated maps are almost  
16 orthogonal in nature and are built of patches of recurrent endogenous activity. The  
17 existence of these reciprocal maps could not have been anticipated based on the  
18 previously available data (Adelsberger et al., 2005; An et al., 2014; Anton-Bolanos et  
19 al., 2019; Golshani et al., 2009; Hanganu et al., 2006; Khazipov et al., 2004; McVea  
20 et al., 2012; Smith et al., 2018; Valeeva et al., 2019). For both behavioral states  
21 studied, the recurrent endogenous activity showed little hemispheric symmetry and  
22 consisted of a complex mixture of (i) small local events, often limited to a given  
23 anatomical region, (ii) larger events, connecting the neighboring cortical regions, as  
24 well as (iii) simultaneous or correlated activity patterns, binding together activities of  
25 different cortical regions located up to 6 mm apart. Moreover, the patterns of the  
26 binding activity were different between the different behavioral states with

1 somatosensory-motor areas functionally connecting during the motion and the  
2 auditory-visual areas functionally connecting during the rest.  
3 Interestingly, frontal and parieto-occipital activity patterns were revealed (by EEG  
4 recordings) also in the perinatal human cortex (Omidvarnia et al., 2014). The latter  
5 turned out to be vigilant state-specific with parieto-occipital activity patterns observed  
6 during the active and a more widespread increase in connectivity throughout the  
7 cortex with notable involvement of the frontal areas observed during the quiet sleep  
8 (Tokariev et al., 2019). Despite the robust neuronal activity, the accompanying local  
9 hyperemia is apparently absent in both perinatal humans (Omidvarnia et al., 2014)  
10 and mice (Movie 2-1, (Kozberg et al., 2016)), disabling the analyses of this activity by  
11 fMRI. The “small-worldness” represents another feature, similar for both species  
12 (Figs. 6 and (Omidvarnia et al., 2014)). Compared to adults and full-term newborns,  
13 activity patterns in the perinatal, especially preterm, human cortex are also known for  
14 the reduced interhemispheric synchrony and symmetry (see (Koolen et al., 2014;  
15 Kwon et al., 2015; Meijer et al., 2016; O’Toole et al., 2019) and references therein).  
16 In both mice and humans, this is likely due to the immature corpus callosum,  
17 developing in humans between 35 and 37 weeks of gestation (Meijer et al., 2016;  
18 Son et al., 2017; Wang et al., 2007).  
19 Our work has also identified the unique binding role of the retrosplenial cortex, an  
20 area (i) involved in both motion- and rest-related ongoing activities, especially in their  
21 hemisphere-symmetric subtypes, and (ii) maintaining strong long-range functional  
22 connections with many other studied cortical regions. Although the consensus on the  
23 precise function of this cortical area is still missing, evidence from both human and  
24 animal studies points to its role in spatial navigation, visuospatial integration, and  
25 hippocampus-related learning and memory (Czajkowski et al., 2014; Vann et al.,  
26 2009). Moreover, in adult humans and mice retrosplenial cortex was shown to be

1 active during the resting brain state, thus belonging to the so-called “default mode  
2 network” (Chan et al., 2015; Vann et al., 2009). Whereas many areas of the default  
3 mode network are known to decrease their activity upon engagement into a cognitive  
4 task (Anticevic et al., 2012), this is not the case for the retrosplenial cortex, which  
5 increases its activity, for example, during spatial navigation or autobiographical  
6 memory retrieval (Vann et al., 2009). Of special interest is also the fact that although  
7 areas involved in the default mode network vary across different age groups, this is  
8 not the case for the retrosplenial cortex, which represents its inherent part from early  
9 infancy through adolescence into adulthood (Vann et al., 2009). We hypothesize that  
10 both in humans and now also in mice from early on the retrosplenial cortex  
11 represents a functional bridge between the default mode network active at rest and  
12 the task- or movement-specific neural networks coordinating ongoing activity in the  
13 sensorimotor system. To do so, the retrosplenial cortex engages in a behavioral  
14 state-specific coherent activity with the respective cortical areas: visual cortex at rest  
15 and somatomotor cortices during motion.

16 The long-range nature of the latter functional connections is in marked contrast with  
17 the developmental state of the immature P3 mouse brain, in which long-range  
18 anatomical connections are immature (Hartung et al., 2016; Tagawa and Hirano,  
19 2012). Interestingly, a recent study of the ferret visual cortex also discovered long-  
20 range (albeit intra-regional) functional connections at the developmental stage (P21 -  
21 22 in ferret) similar to the one studied here (Smith et al., 2018). To explain their data  
22 the authors presented a dynamical rate network model, which in a regime of strongly  
23 heterogeneous local connectivity and moderate input modulation produces  
24 pronounced long-range correlations, similar to the ones observed in an experiment.  
25 Noteworthy, the spatial structure of the correlated activity produced by the model was  
26 fairly robust against changes in the input drive strength, in agreement with the



1 author's data that long-range correlations persisted in the immature cortex even after  
2 silencing the main driving input (i.e. spontaneous retinal waves reaching the visual  
3 cortex via the lateral geniculate nucleus (Smith et al., 2018)). The described above  
4 findings suggest that the neonatal brain utilizes local spontaneously active inputs to  
5 drive the correlated activity of distant cortical regions, thus providing the template for  
6 activity- and  $\text{Ca}^{2+}$ -dependent growth and branching of long-range axonal projections  
7 (Tagawa and Hirano, 2012). Indeed, anatomical studies in adult rodents suggest that  
8 the retrosplenial cortex, to stay with this example, is directly linked with anterior  
9 cingulate, motor, and visual cortices (Oh et al., 2014; Vann et al., 2009; Yamawaki et  
10 al., 2016).

11 Local self-initiated activity and associated spatially-restricted  $\text{Ca}^{2+}$  signals represent  
12 the predominant type of activity also in our study. In-depth characterization of this  
13 type of activity revealed its rich spatiotemporal structure comprising distributed  
14 patches of coherent activity in spatial as well as propagating and stationary waves in  
15 spatiotemporal domains. Strikingly, local cortical activity patterns recorded during the  
16 motion and the resting states populated different brain areas. During the motion,  
17 activity was restricted to the somatosensory-motor area (compare active area in Fig.  
18 2B to the map of the adult mouse brain in ref. (Vanni et al., 2017)), consistent with  
19 the cumulative knowledge derived from earlier reports (An et al., 2014; Khazipov et  
20 al., 2004; McVea et al., 2012; Tiriach et al., 2012) as well as with recent data showing  
21 that active wake movements suppress spontaneous neural activity in the visual  
22 cortex of neonatal rats (Mukherjee et al., 2017). In contrast, during the rest local  
23 activity spared the above areas being mostly restricted to the visual, auditory, and  
24 retrosplenial cortex as well as lateral cortical areas, such as, for example, the  
25 temporal cortex, known for its movement-independent spontaneous network activity  
26 (Adelsberger et al., 2005). In-depth analyses of the propagating and stationary waves



1 showed that the local activity has the highest frequency in the somatosensory cortex  
2 during motion and the highest density in the auditory cortex during rest (Figs. 5-4 and  
3 5-5).

4 The described above segregation of the activity patterns is surprising also in view of  
5 the fact that during the developmental stage studied here both motion and rest are  
6 behaviorally heterogeneous. Indeed, motion comprises both generalized movements  
7 happening during wakefulness and muscle twitches, mainly observed during active  
8 sleep (Seelke et al., 2005; Tiriatic et al., 2014). Similarly, the resting period might also  
9 include both quiet wakefulness and quiet sleep. Because under our experimental  
10 conditions the overall duration of muscle twitches comprised only 5 - 16% of the total  
11 movement time and the amount of data variance related to twitches was only  $0.2 \pm$   
12  $0.6\%$ , the described here motion-related activity pattern is dominated by the one  
13 caused by wake-related generalized movements. Still, it is consistent with the activity  
14 pattern, seen by others during spontaneous muscle twitches (McVea et al., 2012;  
15 Tiriatic et al., 2012). Thus, under conditions when animal's limbs are free to interact  
16 with each other and the supporting surface, both kinds of self-generated movements  
17 discussed above (predominantly wake-related generalized movements: current  
18 study; muscle twitches refs. (Khazipov et al., 2004; McVea et al., 2012; Tiriatic et al.,  
19 2014; Tiriatic et al., 2012)) cause a robust and predominantly reafferent neuronal  
20 activity in the somatosensory-motor area of the cortex. However, the measured here  
21 high amount of data variance associated with self-initiated generalized movements is  
22 in contrast to the belief that "reafference from twitches triggers cascades of neural  
23 activity throughout the sensorimotor system at ages when wake-related movements  
24 largely fail to do so" (Del Rio-Bermudez et al., 2020).

25

26

## 1 **References**

- 2 Ackman, J.B., Burbridge, T.J., Crair, M.C., 2012. Retinal waves coordinate patterned  
3 activity throughout the developing visual system. *Nature* 490, 219-225.
- 4 Ackman, J.B., Crair, M.C., 2014. Role of emergent neural activity in visual map  
5 development. *Current Opinion in Neurobiology* 24, 166-175.
- 6 Adelsberger, H., Garaschuk, O., Konnerth, A., 2005. Cortical calcium waves in  
7 resting newborn mice. *Nat Neurosci* 8, 988-990.
- 8 An, S.M., Kilb, W., Luhmann, H.J., 2014. Sensory-Evoked and Spontaneous Gamma  
9 and Spindle Bursts in Neonatal Rat Motor Cortex. *Journal of Neuroscience* 34,  
10 10870-10883.
- 11 Anticevic, A., Cole, M.W., Murray, J.D., Corlett, P.R., Wang, X.J., Krystal, J.H., 2012.  
12 The role of default network deactivation in cognition and disease. *Trends in*  
13 *Cognitive Sciences* 16, 584-592.
- 14 Anton-Bolanos, N., Sempere-Ferrandez, A., Guillamon-Vivancos, T., Martini, F.J.,  
15 Perez-Saiz, L., Gezelius, H., Filipchuk, A., Valdeolmillos, M., Lopez-Bendito, G.,  
16 2019. Prenatal activity from thalamic neurons governs the emergence of  
17 functional cortical maps in mice. *Science* 364, 987-990.
- 18 Arichi, T., Whitehead, K., Barone, G., Pressler, R., Padormo, F., Edwards, A.D.,  
19 Fabrizi, L., 2017. Localization of spontaneous bursting neuronal activity in the  
20 preterm human brain with simultaneous EEG-fMRI. *Elife* 6.
- 21 Bandeira, F., Lent, R., Herculano-Houzel, S., 2009. Changing numbers of neuronal  
22 and non-neuronal cells underlie postnatal brain growth in the rat. *Proceedings of*  
23 *the National Academy of Sciences of the United States of America* 106, 14108-  
24 14113.
- 25 Benders, M.J., Palmu, K., Menache, C., Borradori-Tolsa, C., Lazeyras, F.,  
26 Sizonenko, S., Dubois, J., Vanhatalo, S., Huppi, P.S., 2015. Early Brain Activity

- 1 Relates to Subsequent Brain Growth in Premature Infants. *Cerebral Cortex* 25,  
2 3014-3024.
- 3 Berry, M.W., Browne, M., Langville, A.N., Pauca, V.P., Plemmons, R.J., 2007.  
4 Algorithms and applications for approximate nonnegative matrix factorization.  
5 *Computational Statistics & Data Analysis* 52, 155-173.
- 6 Blumberg, M.S., 2010. Beyond dreams: do sleep-related movements contribute to  
7 brain development? *Front Neurol* 1, 140.
- 8 Blumberg, M.S., Gall, A.J., Todd, W.D., 2014. The Development of Sleep-Wake  
9 Rhythms and the Search for Elemental Circuits in the Infant Brain. *Behavioral*  
10 *Neuroscience* 128, 250-263.
- 11 Brockmann, M.D., Poschel, B., Cichon, N., Hanganu-Opatz, I.L., 2011. Coupled  
12 Oscillations Mediate Directed Interactions between Prefrontal Cortex and  
13 Hippocampus of the Neonatal Rat. *Neuron* 71, 332-347.
- 14 Castelhana-Carlos, M.J., Sousa, N., Ohl, F., Baumans, V., 2010. Identification  
15 methods in newborn C57BL/6 mice: a developmental and behavioural evaluation.  
16 *Lab Anim* 44, 88-103.
- 17 Chan, A.W., Mohajerani, M.H., LeDue, J.M., Wang, Y.T., Murphy, T.H., 2015.  
18 Mesoscale infraslow spontaneous membrane potential fluctuations recapitulate  
19 high-frequency activity cortical motifs. *Nat Commun* 6, 7738.
- 20 Che, A., Babij, R., Iannone, A.F., Fetcho, R.N., Ferrer, M., Liston, C., Fishell, G., De  
21 Marco Garcia, N.V., 2018. Layer I Interneurons Sharpen Sensory Maps during  
22 Neonatal Development. *Neuron* 99, 98-116 e117.
- 23 Czajkowski, R., Jayaprakash, B., Wiltgen, B., Rogerson, T., Guzman-Karlsson, M.C.,  
24 Barth, A.L., Trachtenberg, J.T., Silva, A.J., 2014. Encoding and storage of spatial  
25 information in the retrosplenial cortex. *Proceedings of the National Academy of*  
26 *Sciences of the United States of America* 111, 8661-8666.

- 1 Del Rio-Bermudez, C., Kim, J., Sokoloff, G., Blumberg, M.S., 2020. Active Sleep  
2 Promotes Coherent Oscillatory Activity in the Cortico-Hippocampal System of  
3 Infant Rats. *Cereb Cortex* 30, 2070-2082.
- 4 Dooley, J.C., Glanz, R.M., Sokoloff, G., Blumberg, M.S., 2020. Self-Generated  
5 Whisker Movements Drive State-Dependent Sensory Input to Developing Barrel  
6 Cortex. *Curr Biol* 30, 2404-2410 e2404.
- 7 Feller, M.B., Scanziani, M., 2005. A precritical period for plasticity in visual cortex.  
8 *Curr Opin Neurobiol* 15, 94-100.
- 9 Friedman, J., Hastie, T., Tibshirani, R., 2008. Sparse inverse covariance estimation  
10 with the graphical lasso. *Biostatistics* 9, 432-441.
- 11 Garaschuk, O., Linn, J., Eilers, J., Konnerth, A., 2000. Large-scale oscillatory calcium  
12 waves in the immature cortex. *Nat Neurosci* 3, 452-459.
- 13 Gee, J.M., Smith, N.A., Fernandez, F.R., Economo, M.N., Brunert, D., Rothermel, M.,  
14 Morris, S.C., Talbot, A., Palumbos, S., Ichida, J.M., Shepherd, J.D., West, P.J.,  
15 Wachowiak, M., Capecchi, M.R., Wilcox, K.S., White, J.A., Tvrdik, P., 2014.  
16 Imaging activity in neurons and glia with a Polr2a-based and cre-dependent  
17 GCaMP5G-IRES-tdTomato reporter mouse. *Neuron* 83, 1058-1072.
- 18 Golshani, P., Goncalves, J.T., Khoshkhoo, S., Mostany, R., Smirnakis, S., Portera-  
19 Cailliau, C., 2009. Internally Mediated Developmental Desynchronization of  
20 Neocortical Network Activity. *Journal of Neuroscience* 29, 10890-10899.
- 21 Golyandina, N., Usevich, K., 2010. 2D-extension of Singular Spectrum Analysis:  
22 algorithm and elements of theory. In: Olshevsky, V., Tyrtyshnikov, E. (Eds.),  
23 *Matrix Methods: Theory, Algorithms, Applications*. World Scientific Publ Co Pte  
24 Ltd, pp. 449-473.

- 1 Hagihara, K.M., Murakami, T., Yoshida, T., Tagawa, Y., Ohki, K., 2015. Neuronal  
2 activity is not required for the initial formation and maturation of visual selectivity.  
3 *Nature Neuroscience* 18, 1780-1788.
- 4 Han, H.J., Allen, C.C., Buchovecky, C.M., Yetman, M.J., Born, H.A., Marin, M.A.,  
5 Rodgers, S.P., Song, B.J., Lu, H.C., Justice, M.J., Probst, F.J., Jankowsky, J.L.,  
6 2012. Strain Background Influences Neurotoxicity and Behavioral Abnormalities  
7 in Mice Expressing the Tetracycline Transactivator. *Journal of Neuroscience* 32,  
8 10574-10586.
- 9 Hanganu-Opatz, I.L., 2010. Between molecules and experience: Role of early  
10 patterns of coordinated activity for the development of cortical maps and sensory  
11 abilities. *Brain Research Reviews* 64, 160-176.
- 12 Hanganu, I.L., Ben-Ari, Y., Khazipov, R., 2006. Retinal waves trigger spindle bursts  
13 in the neonatal rat visual cortex. *J Neurosci* 26, 6728-6736.
- 14 Hartung, H., Brockmann, M.D., Poschel, B., De Feo, V., Hanganu-Opatz, I.L., 2016.  
15 Thalamic and Entorhinal Network Activity Differently Modulates the Functional  
16 Development of Prefrontal-Hippocampal Interactions. *Journal of Neuroscience*  
17 36, 3676-3690.
- 18 Huang, S., Li, J., Sun, L., Ye, J., Fleisher, A., Wu, T., Chen, K., Reiman, E., 2010.  
19 Learning brain connectivity of Alzheimer's disease by sparse inverse covariance  
20 estimation. *Neuroimage* 50, 935-949.
- 21 Jouvett-Mounier, D., Astic, L., Lacote, D., 1970. Ontogenesis of the states of sleep in  
22 rat, cat, and guinea pig during the first postnatal month. *Dev Psychobiol* 2, 216-  
23 239.
- 24 Katz, L.C., Shatz, C.J., 1996. Synaptic activity and the construction of cortical  
25 circuits. *Science* 274, 1133-1138.

- 1 Khazipov, R., Milh, M., 2017. Early patterns of activity in the developing cortex:  
2 Focus on the sensorimotor system. *Semin Cell Dev Biol* 76, 120-129.
- 3 Khazipov, R.N., Sirota, A., Leinekugel, X., Holmes, G.L., Ben-Ari, Y., Buzsaki, G.,  
4 2004. Early motor activity drives spindle bursts in the developing somatosensory  
5 cortex. *Nature* 432, 758-761.
- 6 Kirischuk, S., Sinning, A., Blanquie, O., Yang, J.W., Luhmann, H.J., Kilb, W., 2017.  
7 Modulation of Neocortical Development by Early Neuronal Activity: Physiology  
8 and Pathophysiology. *Frontiers in Cellular Neuroscience* 11.
- 9 Kirkby, L.A., Sack, G.S., Firl, A., Feller, M.B., 2013. A role for correlated spontaneous  
10 activity in the assembly of neural circuits. *Neuron* 80, 1129-1144.
- 11 Kirmse, K., Kummer, M., Kovalchuk, Y., Witte, O.W., Garaschuk, O., Holthoff, K.,  
12 2015. GABA depolarizes immature neurons and inhibits network activity in the  
13 neonatal neocortex in vivo. *Nat Commun* 6, 7750.
- 14 Koolen, N., Dereymaeker, A., Rasanen, O., Jansen, K., Vervisch, J., Matic, V., De  
15 Vos, M., Van Huffel, S., Naulaers, G., Vanhatalo, S., 2014. Interhemispheric  
16 synchrony in the neonatal EEG revisited: activation synchrony index as a  
17 promising classifier. *Frontiers in Human Neuroscience* 8.
- 18 Kozberg, M.G., Ma, Y., Shaik, M.A., Kim, S.H., Hillman, E.M., 2016. Rapid Postnatal  
19 Expansion of Neural Networks Occurs in an Environment of Altered  
20 Neurovascular and Neurometabolic Coupling. *J Neurosci* 36, 6704-6717.
- 21 Kwon, S.H., Scheinost, D., Lacadie, C., Sze, G., Schneider, K.C., Dai, F., Constable,  
22 R.T., Ment, L.R., 2015. Adaptive mechanisms of developing brain: Cerebral  
23 lateralization in the prematurely-born. *Neuroimage* 108, 144-150.
- 24 Lewis, J.P., 1995. Fast Template Matching. *Vision Interface*, 120-123.

- 1 Liang, H.X., Hippenmeyer, S., Ghashghaei, H.T., 2012. A Nestin-cre transgenic  
2 mouse is insufficient for recombination in early embryonic neural progenitors.  
3 *Biology Open* 1, 1200-1203.
- 4 Lim, J.S., 1990. *Two-Dimensional Signal and Image Processing*. Prentice Hall,  
5 Englewood Cliffs, NJ, Prentice Hall.
- 6 Lipton, A.J., Fujiyoshi, H., Patil, R.S., 1998. Moving target classification and tracking  
7 from real-time video. Fourth IEEE Workshop on Applications of Computer Vision -  
8 Wacv'98, Proceedings, 8-14.
- 9 Luhmann, H.J., Sinning, A., Yang, J.W., Reyes-Puerta, V., Stuttgen, M.C., Kirischuk,  
10 S., Kilb, W., 2016. Spontaneous Neuronal Activity in Developing Neocortical  
11 Networks: From Single Cells to Large-Scale Interactions. *Frontiers in Neural*  
12 *Circuits* 10.
- 13 McVea, D.A., Mohajerani, M.H., Murphy, T.H., 2012. Voltage-sensitive dye imaging  
14 reveals dynamic spatiotemporal properties of cortical activity after spontaneous  
15 muscle twitches in the newborn rat. *J Neurosci* 32, 10982-10994.
- 16 McVea, D.A., Murphy, T.H., Mohajerani, M.H., 2016. Large Scale Cortical Functional  
17 Networks Associated with Slow-Wave and Spindle-Burst-Related Spontaneous  
18 Activity. *Frontiers in Neural Circuits* 10.
- 19 Meijer, E.J., Niemarkt, H.J., Raaijmakers, I.P.P.C., Mulder, A.M., van Pul, C., Wijn,  
20 P.F.F., Andriessen, P., 2016. Interhemispheric connectivity estimated from EEG  
21 time-correlation analysis in preterm infants with normal follow-up at age of five.  
22 *Physiological Measurement* 37, 2286-2298.
- 23 Mukherjee, D., Yonk, A.J., Sokoloff, G., Blumberg, M.S., 2017. Wakefulness  
24 suppresses retinal wave-related neural activity in visual cortex. *Journal of*  
25 *Neurophysiology* 118, 1190-1197.

- 1 Nimmerjahn, A., Kirchhoff, F., Kerr, J.N.D., Helmchen, F., 2004. Sulforhodamine 101  
2 as a specific marker of astroglia in the neocortex in vivo. *Nature Methods* 1, 31-  
3 37.
- 4 O'Toole, J.M., Pavlidis, E., Korotchikova, I., Boylan, G.B., Stevenson, N.J., 2019.  
5 Temporal evolution of quantitative EEG within 3 days of birth in early preterm  
6 infants. *Scientific Reports* 9.
- 7 Oh, S.W., Harris, J.A., Ng, L., Winslow, B., Cain, N., Mihalas, S., Wang, Q., Lau, C.,  
8 Kuan, L., Henry, A.M., Mortrud, M.T., Ouellette, B., Nguyen, T.N., Sorensen,  
9 S.A., Slaughterbeck, C.R., Wakeman, W., Li, Y., Feng, D., Ho, A., Nicholas, E.,  
10 Hirokawa, K.E., Bohn, P., Joines, K.M., Peng, H., Hawrylycz, M.J., Phillips, J.W.,  
11 Hohmann, J.G., Wahnoutka, P., Gerfen, C.R., Koch, C., Bernard, A., Dang, C.,  
12 Jones, A.R., Zeng, H., 2014. A mesoscale connectome of the mouse brain.  
13 *Nature* 508, 207-214.
- 14 Omidvarnia, A., Fransson, P., Metsaranta, M., Vanhatalo, S., 2014. Functional  
15 Bimodality in the Brain Networks of Preterm and Term Human Newborns.  
16 *Cerebral Cortex* 24, 2657-2668.
- 17 Oppenheim, A.V., Schaffer, R.W., Buck, J.R., 1999. *Discrete-Time Signal Processing*.  
18 Prentice-Hall Inc., Upper Saddle River, New Jersey 07458.
- 19 Pedregosa, F., Varoquaux, G., Gramfort, A., Michel, V., Thirion, B., Grisel, O.,  
20 Blondel, M., Prettenhofer, P., Weiss, R., Dubourg, V., Vanderplas, J., Passos, A.,  
21 Cournapeau, D., Brucher, M., Perrot, M., Duchesnay, E., 2011. Scikit-learn:  
22 Machine Learning in Python. *Journal of Machine Learning Research* 12, 2825-  
23 2830.
- 24 Petersen, C.C., 2007. The functional organization of the barrel cortex. *Neuron* 56,  
25 339-355.



- 1 Rensing, N., Moy, B., Friedman, J.L., Galindo, R., Wong, M., 2018. Longitudinal  
2 analysis of developmental changes in electroencephalography patterns and  
3 sleep-wake states of the neonatal mouse. *PLoS ONE* 13.
- 4 Seelke, A.M., Karlsson, K.A., Gall, A.J., Blumberg, M.S., 2005. Extraocular muscle  
5 activity, rapid eye movements and the development of active and quiet sleep. *Eur*  
6 *J Neurosci* 22, 911-920.
- 7 Smith, G.B., Hein, B., Whitney, D.E., Fitzpatrick, D., Kaschube, M., 2018. Distributed  
8 network interactions and their emergence in developing neocortex. *Nature*  
9 *Neuroscience* 21, 1600-1608.
- 10 Smith, S.M., 2012. The future of fMRI connectivity. *Neuroimage* 62, 1257-1266.
- 11 Smith, S.M., Miller, K.L., Salimi-Khorshidi, G., Webster, M., Beckmann, C.F., Nichols,  
12 T.E., Ramsey, J.D., Woolrich, M.W., 2011. Network modelling methods for fMRI.  
13 *Neuroimage* 54, 875-891.
- 14 Son, A.I., Fu, X.Q., Suto, F., Liu, J.S., Hashimoto-Torii, K., Torii, M., 2017. Proteome  
15 dynamics during postnatal mouse corpus callosum development. *Scientific*  
16 *Reports* 7.
- 17 Steinmetz, N.A., Buetfering, C., Lecoq, J., Lee, C.R., Peters, A.J., Jacobs, E.A.K.,  
18 Coen, P., Ollerenshaw, D.R., Valley, M.T., de Vries, S.E.J., Garrett, M., Zhuang,  
19 J., Groblewski, P.A., Manavi, S., Miles, J., White, C., Lee, E., Griffin, F., Larkin,  
20 J.D., Roll, K., Cross, S., Nguyen, T.V., Larsen, R., Pendergraft, J., Daigle, T.,  
21 Tasic, B., Thompson, C.L., Waters, J., Olsen, S., Margolis, D.J., Zeng, H.,  
22 Hausser, M., Carandini, M., Harris, K.D., 2017. Aberrant Cortical Activity in  
23 Multiple GCaMP6-Expressing Transgenic Mouse Lines. *eNeuro* 4.
- 24 Tagawa, Y., Hirano, T., 2012. Activity-Dependent Callosal Axon Projections in  
25 Neonatal Mouse Cerebral Cortex. *Neural Plasticity* 2012, 797295.

- 1 Tian, G.F., Takano, T., Lin, J.H.C., Wang, X.H., Bekar, L., Nedergaard, M., 2006.  
2 Imaging of cortical astrocytes using 2-photon laser scanning microscopy in the  
3 intact mouse brain. *Advanced Drug Delivery Reviews* 58, 773-787.
- 4 Tiriac, A., Del Rio-Bermudez, C., Blumberg, M.S., 2014. Self-Generated Movements  
5 with "Unexpected" Sensory Consequences. *Current Biology* 24, 2136-2141.
- 6 Tiriac, A., Uitermarkt, B.D., Fanning, A.S., Sokoloff, G., Blumberg, M.S., 2012. Rapid  
7 Whisker Movements in Sleeping Newborn Rats. *Current Biology* 22, 2075-2080.
- 8 Tokariev, A., Roberts, J.A., Zalesky, A., Zhao, X.L., Vanhatalo, S., Breakspear, M.,  
9 Cocchi, L., 2019. Large-scale brain modes reorganize between infant sleep  
10 states and carry prognostic information for preterms. *Nat Commun* 10.
- 11 Valeeva, G., Janackova, S., Nasretdinov, A., Rychkova, V., Makarov, R., Holmes,  
12 G.L., Khazipov, R., Lenck-Santini, P.P., 2019. Emergence of Coordinated Activity  
13 in the Developing Entorhinal-Hippocampal Network. *Cereb Cortex* 29, 906-920.
- 14 Vanhatalo, S., Tallgren, P., Andersson, S., Sainio, K., Voipio, J., Kaila, K., 2002. DC-  
15 EEG discloses prominent, very slow activity patterns during sleep in preterm  
16 infants. *Clin Neurophysiol* 113, 1822-1825.
- 17 Vann, S.D., Aggleton, J.P., Maguire, E.A., 2009. What does the retrosplenial cortex  
18 do? *Nature Reviews Neuroscience* 10, 792-802.
- 19 Vanni, M.P., Chan, A.W., Balbi, M., Silasi, G., Murphy, T.H., 2017. Mesoscale  
20 Mapping of Mouse Cortex Reveals Frequency-Dependent Cycling between  
21 Distinct Macroscale Functional Modules. *J Neurosci* 37, 7513-7533.
- 22 Wang, C.L., Zhang, L., Zhou, Y., Zhou, J., Yang, X.J., Duan, S.M., Xiong, Z.Q., Ding,  
23 Y.Q., 2007. Activity-dependent development of callosal projections in the  
24 somatosensory cortex. *J Neurosci* 27, 11334-11342.

1 Yamawaki, N., Radulovic, J., Shepherd, G.M.G., 2016. A Corticocortical Circuit  
2 Directly Links Retrosplenial Cortex to M2 in the Mouse. *Journal of Neuroscience*  
3 36, 9365-9374.

4

#### 5 **Author contributions**

6 O.G. conceived the study. Y.K. and O.G. designed and performed the experiments.  
7 N.M. and A.B. developed analysis procedures and N.M. analyzed the data. O.G.,  
8 N.M., and Y.K. wrote the manuscript. All authors commented on the manuscript.

9

#### 10 **Data and software availability**

11 The data and the Matlab code used are available from the corresponding author  
12 upon reasonable request.

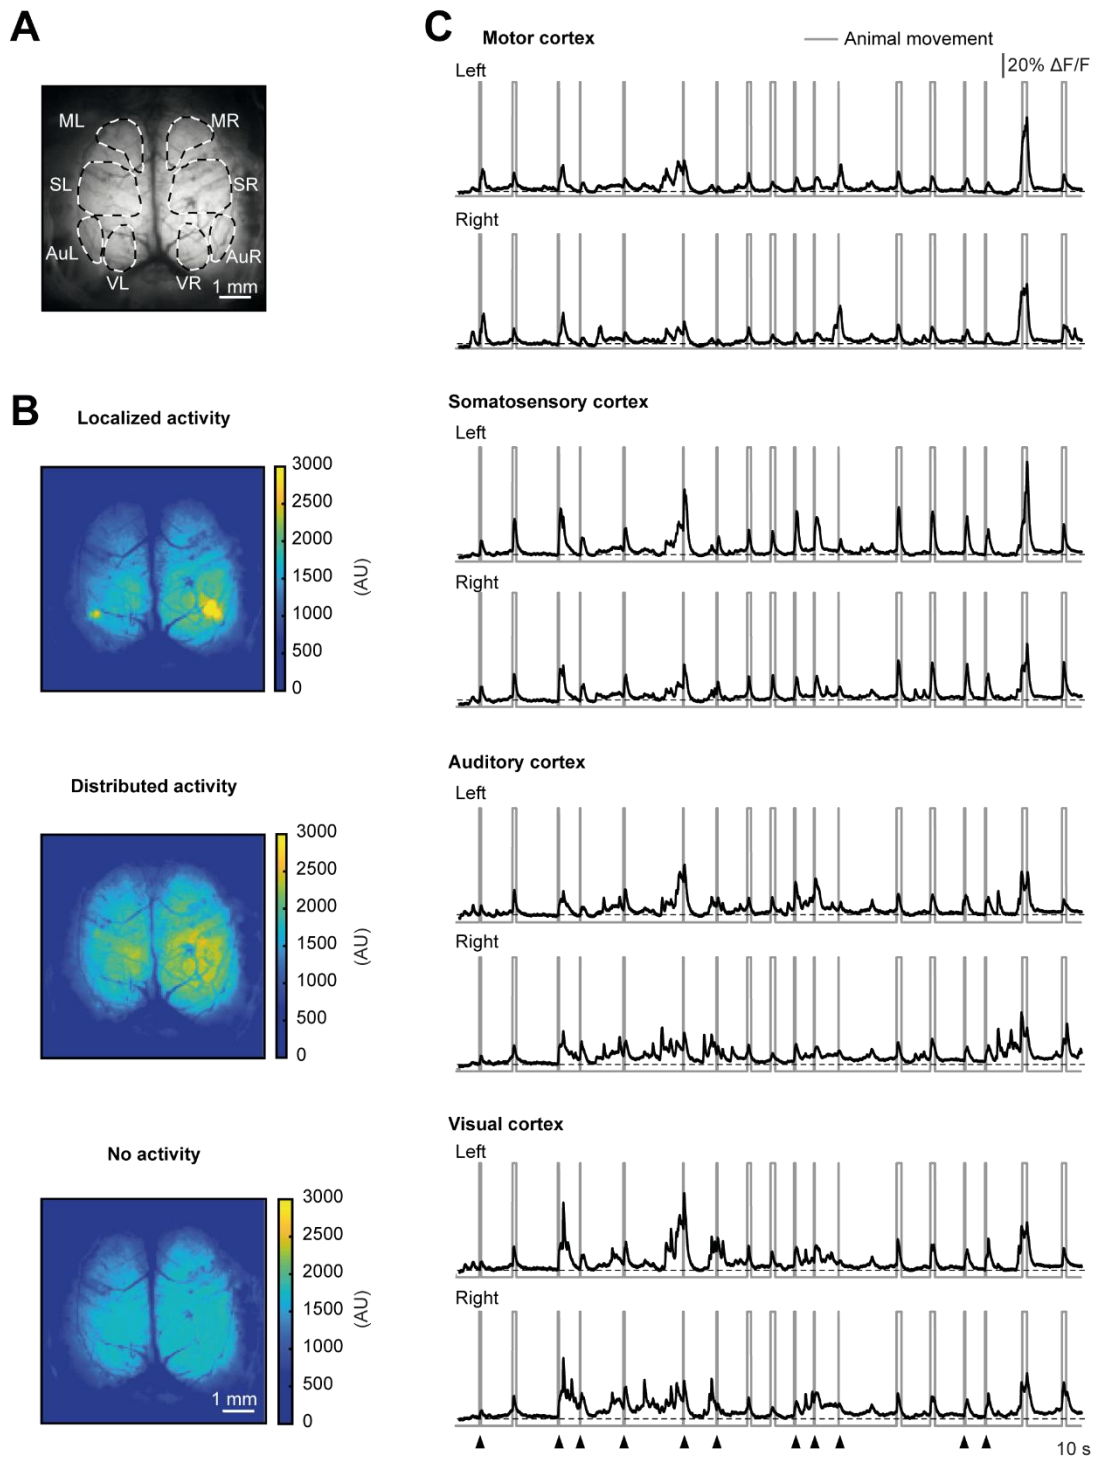

1

2 **Fig. 1. Large-scale spontaneous neuronal activity in the neonatal mouse cortex.**

3 **A**, Top view on a P3 mouse cortex taken through an intact skull. Broken lines delineate cortical  
4 regions of interest (estimated as in (Gee et al., 2014)): ML, MR - motor cortex (left and right), SL, SR -  
5 somatosensory cortex (left and right), AuL, AuR - auditory cortex (left and right) and VL, VR -  
6 visual cortex (left and right). **B**, Averages of 100 consecutive autofluorescence-subtracted images taken  
7 during periods of either local (top) or global (middle) cortical activities or no activity (bottom).  
8 Autofluorescence values are averages of mean pixel values recorded in three different 3-day-old  
9 C57BL/6 mice. Subtraction was done for display purposes only. Image brightness (arbitrary units, AU)  
10 is color coded, with warm colors reflecting higher values. **C**, 200-second-long  $\Delta F/F$  traces recorded  
11 from ROIs delineated in **A**. Gray boxes mark periods of animal's movement. Arrowheads mark muscle  
12 twitches. Data shown are from mouse 1 (Fig. 2-2).

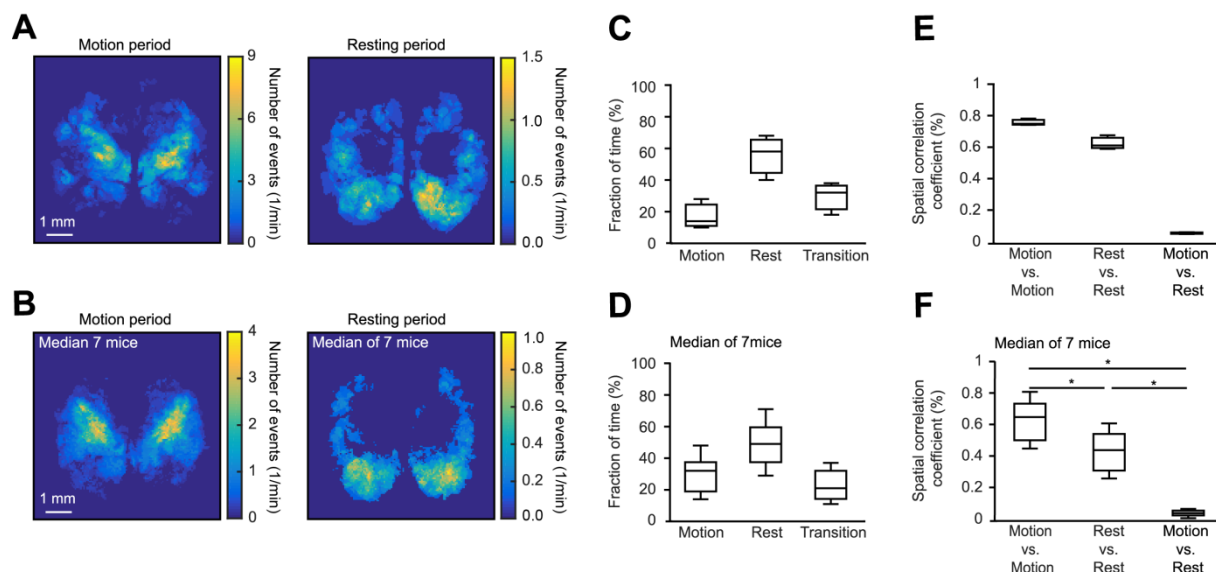

1

2 **Fig. 2. ROI-based frequency maps of local activity.**

3 **A**, Representative frequency maps (NMF-based ROI analysis) recorded in a mouse 5 (Fig. 2-2) during  
 4 motion (left panel) and resting (right panel) time periods. **B**, Same analyses as in **A**, but each pixel is a  
 5 median of data obtained in 7 different animals. **C**, Box-and-whisker plots illustrating the fraction of time  
 6 animals spent in three different states: motion, rest and transition. The plot shows representative data  
 7 from one mouse (same as in **A**, n=3 consecutive 10-min-long image series). **D**, Same analyses as in  
 8 **C** but the plot shows a median of 7 mice. A significant difference was observed between the fractions  
 9 of time spent in 3 different conditions (One-way repeated measure ANOVA followed by Holm-Sidak  
 10 multiple comparisons test,  $F_{1,79,10.73}^* = 5.4$ ,  $P = 0.03$ , here and below a star (\*) denotes Greenhaus-  
 11 Geisser sphericity correction). However, pairwise comparisons using Holm-Sidak post-hoc test did not  
 12 reach the level of statistical significance. **E**, Box-and-whisker plot illustrating spatial correlation  
 13 coefficients within and between maps obtained during motion and resting time periods (3 maps, each  
 14 representing a 10-min-long image series recorded in a mouse shown in **A**). **F**, Box-and-whisker plot  
 15 illustrating median (per mouse) spatial correlation coefficients within and between maps obtained  
 16 during motion and resting time periods. Obtained values are significantly different (One-way repeated  
 17 measure ANOVA followed by Holm-Sidak multiple comparisons test,  $F_{1,6,9.62}^* = 71.1$ ,  $P < 10^{-3}$ , motion  
 18 vs. rest:  $P = 10^{-3}$ , the other two comparisons:  $P < 10^{-3}$ ).

19

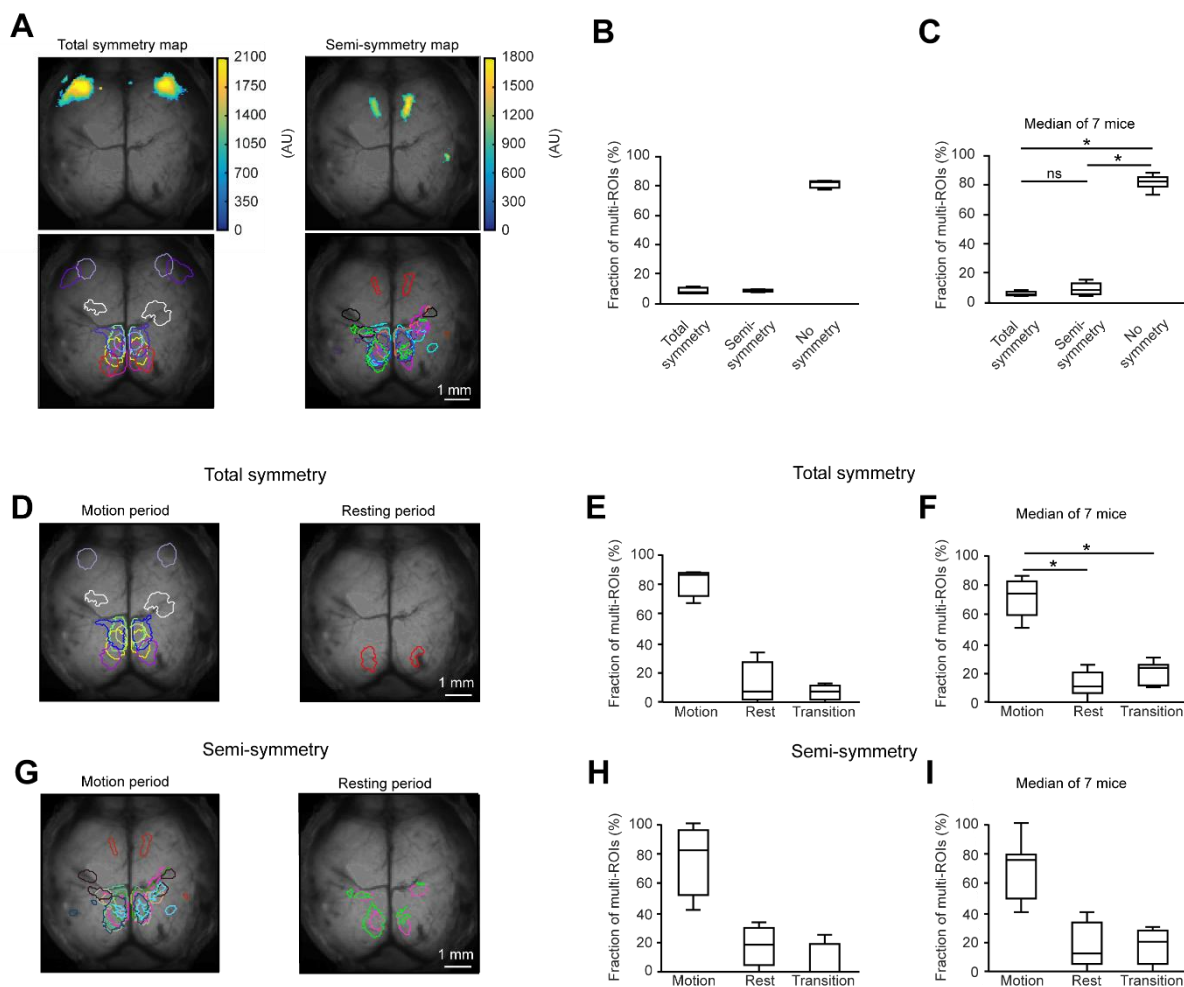

1  
2  
3  
4  
5  
6  
7  
8  
9  
10  
11  
12  
13  
14  
15  
16  
17  
18  
19  
20  
21  
22  
23  
24  
25

### Fig. 3. Hemisphere-symmetric neuronal activity in the neonatal mouse cortex.

**A**, Representative active subregions belonging to one multi-ROI filter (upper) as well as symmetry maps (lower) projected on a grayscale image of P3 mouse cortex. Here and in Fig. 4 the sample data are from mouse 4 (Fig. 2-2). Upper panels: fluorescence signals are color-coded with warmer colors indicating higher signal intensity. Lower panels: different colors delineate multi-ROIs, each satisfying the total (left panel) or semi- (right panel) symmetry criterion (see Materials and methods). **B**, Box-and-whisker plot illustrating the median fractions of multi-ROIs in three distinct categories: total, semi-, and no symmetry (3 consecutive 10-min-long image series recorded in mouse 4). **C**, Same analyses as in **B** illustrating the median data obtained in 7 different animals. Obtained values are significantly different (One-way repeated measure ANOVA followed by Holm-Sidak multiple comparisons test,  $F_{1,26,7.56}^* = 625.7$ ,  $P < 10^{-3}$ ;  $P < 10^{-3}$  for both semi-symmetry vs. no symmetry, and total symmetry vs. no symmetry comparisons). **D**, Representative total symmetry maps recorded during motion (left panel) and resting (right panel) time periods (mouse 4). Different colors delineate multi-ROIs, each satisfying the total symmetry criterion. **E**, Box-and-whisker plot showing the median fractions of symmetric multi-ROIs during the three time periods: motion, rest, and transition (3 consecutive 10-min-long image series recorded in mouse 4). **F**, Same analyses as in **E** illustrating the median data obtained in 7 different animals. Obtained values are significantly different (One-way repeated measure ANOVA followed by Holm-Sidak multiple comparisons test,  $F_{1,5,9.02}^* = 44.7$ ,  $P < 10^{-3}$ ;  $P = 10^{-3}$  for both comparisons). **G**, Similar maps as in **D** but here colors delineate multi-ROIs, each satisfying the semi-symmetry criterion. **H**, Box-and-whisker plot showing the median fractions semi-symmetric multi-ROIs during the three time periods: motion, rest, and transition (3 consecutive 10-min-long image series recorded in mouse 4). **I**, Same analyses as in **H** illustrating the median data obtained in 7 different animals.

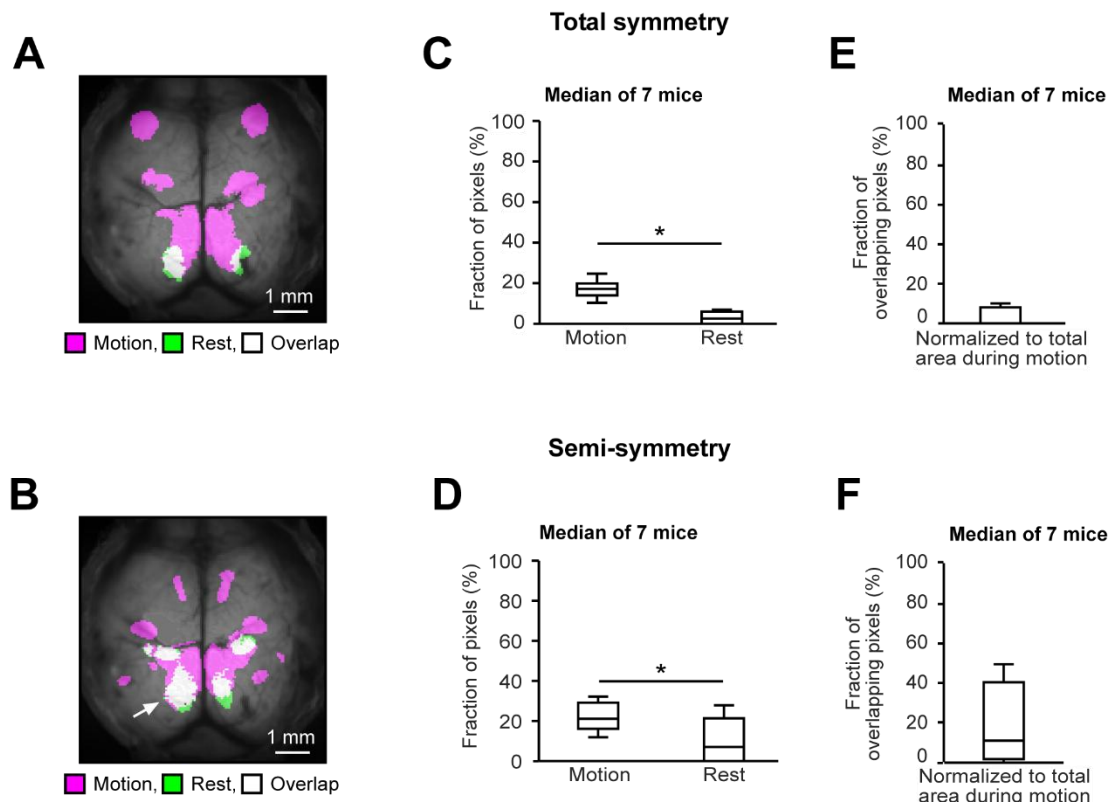

1  
2 **Fig. 4. Regions contributing to hemisphere-symmetric cortical activity in the neonatal mouse**  
3 **cortex differ between behavioral states.**

4 **A**, Spatial representation of the overlap between total symmetry maps recorded during motion and  
5 resting time periods in a P3 mouse. Purple color indicates the area active during the motion period,  
6 green color marks the area active during the resting period and white color shows the overlapping  
7 area. **B**, The same representation as in **A** but for the semi-symmetry map obtained in the same  
8 experimental animal. The arrow points to the retrosplenial cortex. For display purposes, an experiment  
9 with a prominent overlap is shown. **C**, Box-and-whisker plot showing the number of pixels belonging to  
10 the total symmetry map during motion (purple area) and rest (green area), as median (per mouse)  
11 fractions of the total number of imaged cortical pixels ( $n = 7$  mice). Obtained values are significantly  
12 different (paired Student's t-test,  $t_5 = 7$ ,  $P < 10^{-3}$ ). **D**, The same analyses as in **C** but for the areas  
13 contributing to the semi-symmetry map. Obtained values are significantly different (paired Student's t-  
14 test,  $t_5 = 5.7$ ,  $P = 2 \times 10^{-3}$ ). **E**, Box-and-whisker plot showing median (per mouse) numbers of pixels  
15 belonging to the white area (as in **A**) normalized to the number of pixels belonging to the purple area  
16 ( $n = 7$  mice). **F**, The same analyses as in **E** but for the areas contributing to the semi-symmetry map.  
17



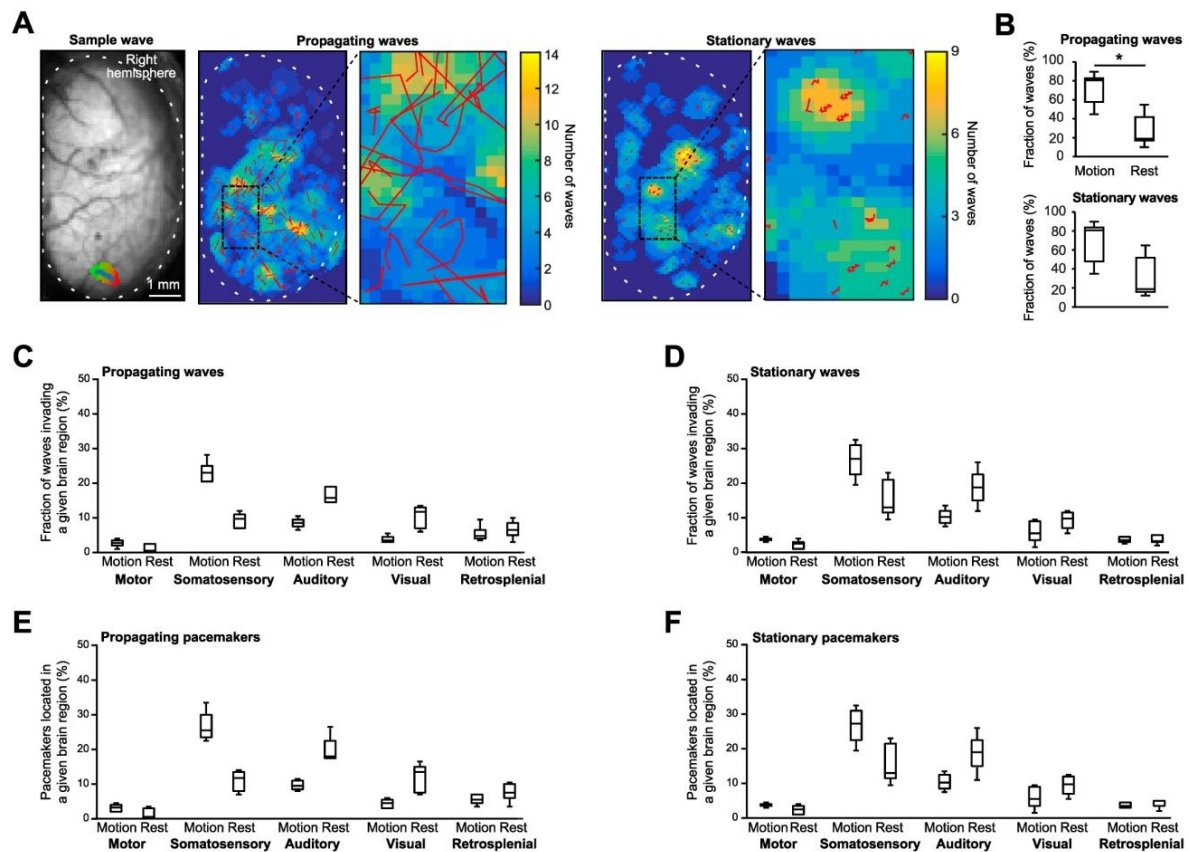

1

2 **Fig. 5. Stationary and propagating  $Ca^{2+}$  waves in the neonatal mouse cortex.** **A**, Left panel shows  
 3 (from left to right): (i) top view on a right hemisphere of P3 mouse cortex (mouse 5 in Fig. 2-2) with a  
 4 sample propagating wave (the direction of movement is color coded from green to red, blue stars  
 5 depict the location of the center of mass in each frame (see Materials and methods); (ii) a  
 6 superposition of propagating waves recorded in this animal in 6 min (here and below the  
 7 corresponding center of mass trajectories are depicted as red lines) and (iii) the framed area, shown  
 8 on an expanded scale. Right panel shows (from left to right): (i) a superposition of stationary waves  
 9 recorded in this animal in 6 min and (ii) the framed area shown on an expanded scale. Broken lines  
 10 delineate the contour of the brain area imaged in this experiment. False colors reflect the number of  
 11 waves each pixel was involved into. **B**, Box-and-whisker plots showing median (per mouse) fractions  
 12 of propagating (upper panel -  $t_5 = 3.21$ ,  $P = 0.024$ ) and stationary (lower panel) waves happening  
 13 during motion and rest, respectively (n = 6 mice). For each mouse, the number of propagating waves  
 14 during the motion (or rest) was normalized to the number of all propagating waves recorded. A similar  
 15 normalization procedure was used for stationary waves. **C**, **D**, Box-and-whisker plots showing  
 16 averaged between the two hemispheres median (per mouse) fractions of propagating **C**, and  
 17 stationary **D**, waves invading the respective cortical regions. **E**, **F**, Similar analyses as in **C**, **D** but  
 18 illustrating median (per mouse) fractions of pacemakers for propagating **E**, and stationary **F**, waves  
 19 located in the given cortical region (n = 6 mice). To calculate the fraction of propagating/stationary  
 20 waves in a given cortical region during the motion/rest the number of propagating waves observed in  
 21 this region during this particular state was normalized to the number of all propagating waves detected  
 22 in this state.

23



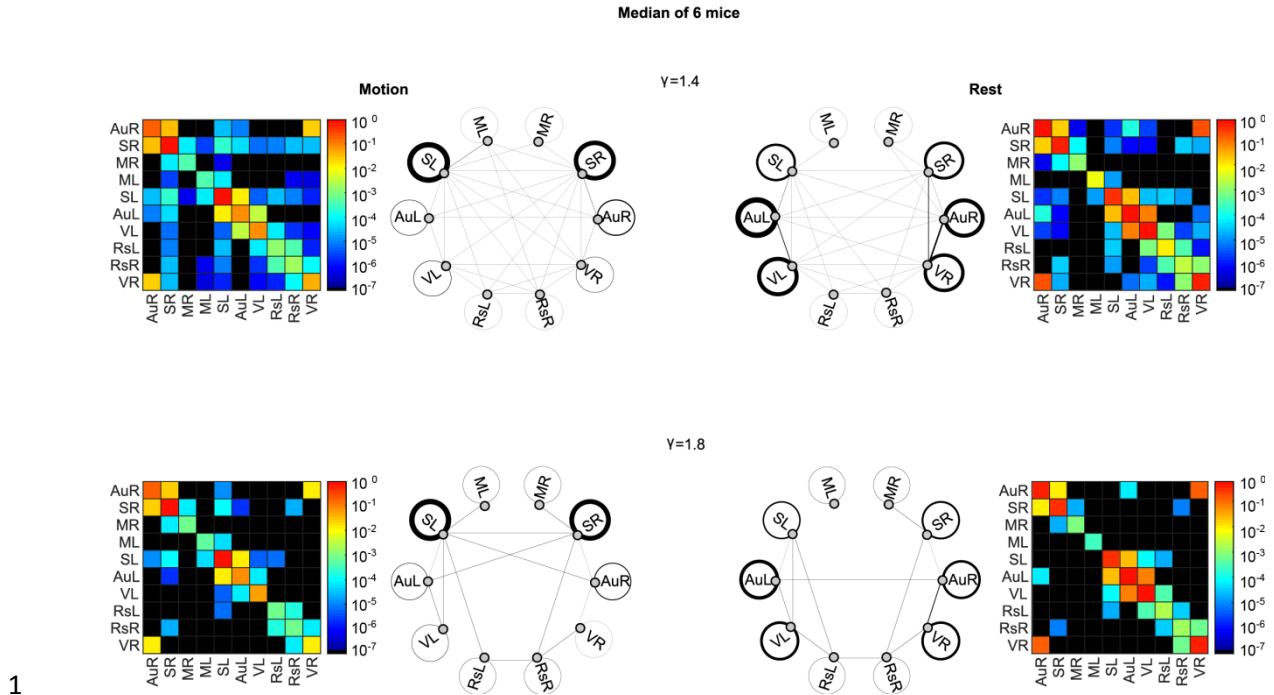

1

2 **Fig. 6. Functional connectivity map.**

3 Direct connectivity maps calculated for motion (left panels) and resting (right panels) periods with two  
 4 different values of  $\gamma$  (see Materials and methods). Each connectivity map is shown in the matrix as  
 5 well as trivial graph format. In the latter format, nodes represent cortical regions of interest predefined  
 6 in Fig. 5-1A, and edges between the two nodes show the direct connectivity between the two cortical  
 7 regions. Edge thickness represents the median strength of connections between the two cortical  
 8 regions. Similarly, circles depict connectivity within the given cortical region, and the thickness of each  
 9 circled line shows the median strength of connections in this cortical region. Note that in the matrix  
 10 format the strength of connectivity is shown on a logarithmic scale, providing a higher dynamic range.  
 11 Median of data obtained from 6 different animals. Color-coded scale bars show median connectivity  
 12 strength within and among cortical regions (see Materials and methods for details).
